# Supplementary material for: Liver Transcriptome Dynamics During Hibernation Are Shaped by a Shifting Balance Between Transcription and RNA Stability
Source: Front Physiol. 2021 May 21;12:662132. doi: 10.3389/fphys.2021.662132 (PMC8176218; doi:10.3389/fphys.2021.662132)
Supplement: Supplementary file 8 [file Table_3.XLSX]

## Sheet: GeneEnrichmen(RNA-seq)
Supplementary Table 3. Gene enrichment analysis (DAVID) of co-expressed genes in liver RNAseq data with p<0.001; q<0.001 in bold
Category	Term	Count	PValue	Genes	Fold Enrichment	Benjamini	cluster
GOTERM_CC_DIRECT	GO:0005829~cytosol	124	7.52269e-10	MEF2C, NT5C3B, LSM7, RANGAP1, SHB, EIF4EBP1, HTRA2, SPRED2, RAB24, SMOX, EDARADD, YARS, CARS, CHAC1, NUDT14, EEF2, OPTN, DDIT3, VAMP8, EIF2S2, AKAP1, NEK6, ADD1, ARFGAP1, CHKA, EIF4E3, SNX5, CHKB, ARFRP1, GIPC1, RIOK1, RRAGD, RILPL1, ISYNA1, EIF3B, FBXO6, EIF3M, ARHGDIA, AP2M1, ARHGDIB, XPOT, ODC1, ABR, SMAD6, TGFBR2, GARS, BPGM, SMYD2, UAP1L1, NOTCH3, CBLB, UBA2, GLMP, BET1L, WDR1, SAT1, IMPA2, …	1.69152	3.09935e-07	Winter_high
GOTERM_CC_DIRECT	GO:0016020~membrane	89	1.53128e-08	AKNA, SLC27A1, ATL2, ALG1, HEXA, FERMT3, HPS4, RCE1, CHPF2, ELOVL1, BZW2, PLCB3, FAM49B, HTRA2, WWP2, DDX24, SPRED2, NECAP2, RAB24, SLC4A2, CREB3L3, IMPDH2, KHDRBS1, PPP2R1A, EFTUD2, FLOT2, PTBP1, EEF2, MFGE8, CLIC1, HNRNPU, EML4, GAK, VEGFB, EIF4A3, ADRM1, MED16, VAMP8, IPO4, EIF4A1, ARL8A, AKAP8, RUVBL1, BIN1, AKAP1, MATR3, CLN6, HLA-DRB1, RAP1GAP, MFSD5, LMF2, ARFRP1, NUP93, RPL36, SFXN4, GIPC…	1.82939	3.15443e-06	Winter_high
GOTERM_MF_DIRECT	GO:0005515~protein binding	256	3.41016e-08	MEF2C, FAM20A, LSM7, HIRA, RANGAP1, ZGPAT, SHB, SFSWAP, INTS8, BRPF1, HTRA2, WWP2, MED27, RAB24, RAB26, CREB3L3, YARS, PCID2, NUDT14, ANKS3, PTBP1, PIM1, USHBP1, OPTN, VEGFB, MED16, EIF2S2, ARL8A, CMIP, MAD2L2, BIN1, FASTKD5, NEK6, SH3GL1, FUS, CRTC1, PABPC4, ARF6, BOP1, RCC1, CD74, HADHA, HADHB, VRK2, FBXO6, SUPV3L1, TCF3, DHX57, ODC1, OSBPL2, NOC4L, SMAD6, TGFBR2, S100A11, S100A10, SKI, TMEM110…	1.26134	2.13474e-05	Winter_high
GOTERM_CC_DIRECT	GO:0005654~nucleoplasm	104	3.84538e-08	MEF2C, RBM3, LSM7, HIRA, INTS8, BRPF1, EIF4EBP1, SLC25A22, MED27, EFTUD2, PTBP1, MTA1, OPTN, TATDN2, DDIT3, HNRNPU, ADRM1, MED16, GTF2IRD1, AKAP8, MAD2L2, NEK6, ADD1, FUS, TNRC18, CRTC1, NTMT1, BOP1, RIOK1, RCC1, RILPL1, EIF3B, SMARCB1, METTL1, TCF3, XPOT, NOC4L, PCIF1, PTPN2, GARS, TOMM40, SKI, SMYD2, KAT5, HNRNPA1, HNRNPA0, NOTCH3, CBLB, ATF4, UBA2, ETS2, GAR1, PPARG, PPIP5K1, DMAP1, AKT1, PRMT…	1.68928	5.28098e-06	Winter_high
GOTERM_MF_DIRECT	GO:0044822~poly(A) RNA binding	55	2.46603e-07	GAR1, RBM3, LSM14B, PRMT1, DDX24, PTBP2, KHDRBS1, YARS, ARHGEF1, EXOSC9, EFTUD2, PTBP1, UBE2I, EEF2, HNRNPU, NOC2L, EIF4A3, EIF4A1, EIF2S2, DNTTIP2, AKAP8, AKAP1, FASTKD5, WDR43, MATR3, ADD1, FUS, PABPC4, RPL36, BOP1, SF3B4, PUS7, HADHB, EXOSC10, EZR, AATF, SUPV3L1, DUS3L, DHX57, NOC4L, PPAN-P2RY11, RRBP1, ALYREF, NTPCR, TRIM28, ILF3, CSRP1, SF3A2, HNRNPA1, SF3A1, HNRNPA0, UBTF, SFPQ, MEX3D, TRIP6	2.10864	7.71839e-05	Winter_high
GOTERM_CC_DIRECT	GO:0005913~cell-cell adherens junction	21	3.53039e-05	SNX5, FLOT2, S100A11, GIPC1, EEF2, RANGAP1, CLIC1, VASP, MICALL1, BZW2, NOTCH3, PLCB3, EZR, ATIC, PAK4, EXOC3, FAM129B, RUVBL1, CC2D1A, SH3GL1, ADD1	2.94005	0.00362977	Winter_high
GOTERM_MF_DIRECT	GO:0098641~cadherin binding involved in cell-cell adhesion	20	4.60049e-05	SNX5, S100A11, GIPC1, EEF2, RANGAP1, CLIC1, VASP, MICALL1, BZW2, NOTCH3, PLCB3, EZR, ATIC, PAK4, EXOC3, FAM129B, RUVBL1, CC2D1A, SH3GL1, ADD1	2.98515	0.00955398	Winter_high
GOTERM_CC_DIRECT	GO:0005737~cytoplasm	151	9.21709e-05	MEF2C, NT5C3B, RBM3, GNA11, RANGAP1, EIF4EBP1, BRPF1, COLCA2, WWP2, MED27, SMOX, YARS, CARS, EFTUD2, PIM1, MTA1, EEF2, TMSB10, OPTN, TATDN2, ANKRD13A, DDIT3, TNS3, ADRM1, VAMP8, GTF2IRD1, EIF2S2, CMIP, ARL8A, MAD2L2, BIN1, NEK6, CRACR2B, SH3GL1, EIF4E3, TNRC18, PAFAH2, CRTC1, PABPC4, GIPC1, NTMT1, BOP1, RRAGD, RCC1, RILPL1, ISYNA1, VRK2, EIF3B, METTL1, FBXO6, SLC30A2, TCF3, ARHGDIA, ARHGDIB, XPOT…	1.30761	0.00756646	Winter_high
GOTERM_CC_DIRECT	GO:0070062~extracellular exosome	91	0.000124777	GNPTG, SGSH, FAM20A, TOLLIP, GNA11, HEXA, FERMT3, SAT2, HIRA, ACOT2, BCAM, TOR3A, FAM49B, WWP2, TUBB6, CETP, ESAM, FAM129B, IMPDH2, IDUA, PPP2R1A, SCAMP3, EXOSC9, APCS, NUDT14, SNUPN, FLOT2, CHTF8, PTBP1, MTA1, EEF2, MFGE8, CLIC1, RFTN1, VASP, CST6, VAMP8, CD82, EIF4A1, ARL8A, RUVBL1, HLA-DRB1, GIPC1, ARF6, PLVAP, STUB1, ITM2C, CD74, HADHB, TIMP1, SERINC2, CD9, SERINC5, EZR, EIF3B, LRG1, ATIC, RB…	1.46393	0.00853197	Winter_high
GOTERM_BP_DIRECT	GO:0098609~cell-cell adhesion	18	0.00019857	SNX5, S100A11, EEF2, RANGAP1, GIPC1, VASP, MICALL1, BZW2, NOTCH3, PLCB3, ATIC, PAK4, EXOC3, FAM129B, RUVBL1, CC2D1A, SH3GL1, ADD1	2.86719	0.330318	Winter_high
GOTERM_CC_DIRECT	GO:0005634~nucleus	153	0.000262905	MEF2C, AKNA, RBM3, HIRA, MMP2, SFSWAP, ZGPAT, BRPF1, HTRA2, WWP2, MED27, SMOX, CREB3L3, PTBP2, YARS, CHTF8, PTBP1, PIM1, MTA1, EEF2, OPTN, TATDN2, DDIT3, HNRNPU, ADRM1, PRCC, MED16, GTF2IRD1, EIF2S2, NLE1, CMIP, SURF2, DNTTIP2, AKAP8, MAD2L2, NEK6, ADD1, FUS, TNRC18, CRTC1, PABPC4, NTMT1, BOP1, RRAGD, RCC1, PUS7, VRK2, SMARCB1, METTL1, SUPV3L1, TCF3, ARHGDIA, DHX57, NOC4L, PTPN2, SMAD6, S100A11, …	1.27771	0.0153567	Winter_high
GOTERM_CC_DIRECT	GO:0000139~Golgi membrane	28	0.000314507	GNPTG, RAP1GAP, HLA-DRB1, CHPF2, CYTH3, CD74, GNPTAB, SLC35B2, RAB26, HLA-DPB1, IFNGR2, KDELR3, MGAT4B, STX6, SCAMP3, B4GALT2, CREB3, OPTN, LPCAT2, GLCE, NOTCH3, SLC35C1, COG7, BET1L, HLA-DPA1, PXYLP1, PMEPA1, CLCN5	2.14244	0.0160692	Winter_high
GOTERM_CC_DIRECT	GO:0005730~nucleolus	36	0.000353274	APEX2, GAR1, RBM3, TRIB3, RPL36, BOP1, EXOSC10, EZR, SMARCB1, METTL1, DDX24, MED27, MLLT1, AATF, FAM129B, VMP1, MYC, PINX1, EXOSC9, NOC4L, PPAN-P2RY11, EXOSC4, PTBP1, ILF3, CDK4, KAT5, PWP1, NOC2L, COG7, UBTF, MAP1S, NLE1, SURF2, DNTTIP2, AKAP8, WDR43	1.89959	0.0160449	Winter_high
GOTERM_BP_DIRECT	GO:0000122~negative regulation of transcription from RNA polymerase II promoter	32	0.000669013	MEF2C, RITA1, PPARG, TRIB3, DMAP1, ZGPAT, EZR, HSF1, WWP2, SOX18, CC2D1A, MYC, TCF3, KMT5A, PTPN2, TBX2, TRIM28, KLF16, UBE2I, SKI, SMYD2, KAT5, SIRT2, DDIT3, NOC2L, NOTCH3, SFPQ, ETS2, ZFPM1, MAD2L2, TBL1X, CRYM	1.91854	0.491146	Winter_high
GOTERM_MF_DIRECT	GO:0001078~transcriptional repressor activity, RNA polymerase II core promoter proximal region sequence-specific binding	10	0.00106699	ZGPAT, HSF1, TBX2, ETS2, KLF16, NFATC4, SKI, CC2D1A, ZFPM1, TCF3	3.89951	0.153862	Winter_high
GOTERM_CC_DIRECT	GO:0005925~focal adhesion	20	0.00115803	TRIOBP, ARHGEF7, FLOT2, HSPG2, ARF6, CSRP1, HMGA1, VASP, GAK, CD9, TNS3, CYBA, EZR, SVIL, PAK4, SLC4A2, AATF, MARCKS, TRIP6, ADD1	2.31309	0.046617	Winter_high
GOTERM_CC_DIRECT	GO:0030658~transport vesicle membrane	6	0.00140429	HLA-DRB1, SPRED2, HLA-DPA1, RAB26, HLA-DPB1, CD74	7.14013	0.0512729	Winter_high
GOTERM_CC_DIRECT	GO:0045323~interleukin-1 receptor complex	3	0.00143491	IRAK1, TOLLIP, TRIP6	45.2208	0.0481052	Winter_high
GOTERM_BP_DIRECT	GO:0006396~RNA processing	9	0.00182486	EXOSC10, SFSWAP, EXOSC9, RBM3, PABPC4, LSM7, SF3A1, HNRNPU, DHX57	4.00519	0.707489	Winter_high
GOTERM_CC_DIRECT	GO:0030669~clathrin-coated endocytic vesicle membrane	6	0.00198639	CD9, HLA-DRB1, HLA-DPA1, HLA-DPB1, CD74, AP2M1	6.61768	0.0610714	Winter_high
GOTERM_BP_DIRECT	GO:0006397~mRNA processing	12	0.00303126	KHDRBS1, SFPQ, EFTUD2, PTBP1, PTBP2, SF3A2, FASTKD5, SF3B4, HNRNPA1, SF3A1, HNRNPA0, CSDC2	2.89388	0.783973	Winter_high
GOTERM_MF_DIRECT	GO:0003924~GTPase activity	14	0.00315171	RAP1GAP, ATL2, EFTUD2, GNA11, ARFRP1, EEF2, ARF6, RRAGD, MFN2, RAB32, LSG1, TUBB6, ARL8A, ARHGDIB	2.58968	0.326466	Winter_high
GOTERM_CC_DIRECT	GO:0030529~intracellular ribonucleoprotein complex	10	0.0032316	LSM14B, EIF4A3, EFTUD2, PABPC4, ILF3, EEF2, BOP1, HNRNPA1, HNRNPA0, HNRNPU	3.32506	0.0908593	Winter_high
GOTERM_MF_DIRECT	GO:0000978~RNA polymerase II core promoter proximal region sequence-specific DNA binding	18	0.00373287	MEF2C, AKNA, CREB3, TBX2, SMAD6, KLF16, SKI, DDIT3, ZGPAT, ATF4, HSF1, SMARCB1, ETS2, NFATC4, SOX18, CC2D1A, TCF3, MYC	2.19471	0.323073	Winter_high
GOTERM_BP_DIRECT	GO:0045746~negative regulation of Notch signaling pathway	5	0.00422016	SLC35C1, RITA1, PEAR1, CHAC1, GDPD5	7.4426	0.818719	Winter_high
GOTERM_CC_DIRECT	GO:0071013~catalytic step 2 spliceosome	8	0.00423558	EIF4A3, EFTUD2, ALYREF, LSM7, SF3A2, HNRNPA1, SF3A1, HNRNPU	3.93225	0.110045	Winter_high
GOTERM_MF_DIRECT	GO:0003723~RNA binding	24	0.00432215	FUS, KHDRBS1, EXOSC9, PCID2, RBM3, PABPC4, RPUSD1, PTBP1, LSM7, ILF3, HNRNPA1, SF3A1, HNRNPA0, PUS7, HNRNPU, SFSWAP, EIF3B, EIF2S2, MEX3D, SUPV3L1, PTBP2, AKAP1, IMPDH2, CSDC2	1.89914	0.321155	Winter_high
GOTERM_BP_DIRECT	GO:0046208~spermine catabolic process	3	0.00508486	SAT1, SAT2, SMOX	25.9003	0.820112	Winter_high
GOTERM_BP_DIRECT	GO:1904385~cellular response to angiotensin	3	0.00508486	CYBA, HSF1, MYC	25.9003	0.820112	Winter_high
GOTERM_CC_DIRECT	GO:0090575~RNA polymerase II transcription factor complex	5	0.00575618	SFPQ, TRIM28, PPARG, HMGA1, TCF3	6.85164	0.138129	Winter_high
GOTERM_CC_DIRECT	GO:0042995~cell projection	7	0.00621388	EZR, MAP1S, FERMT3, WDR1, TRIP10, CAMKK2, SH3GL1	4.22061	0.140208	Winter_high
GOTERM_MF_DIRECT	GO:0008134~transcription factor binding	15	0.00644334	PPARG, PIM1, UBE2I, HMGA1, DDIT3, SIRT2, WWP2, UBA2, NFATC4, ZFPM1, TBL1X, MYC, TCF3, CSDC2, ADD1	2.28616	0.396991	Winter_high
GOTERM_CC_DIRECT	GO:0043231~intracellular membrane-bounded organelle	23	0.00649203	MEF2C, CEP131, SCAMP3, APEX2, ALYREF, PPARG, SFXN4, MTA1, RANGAP1, CCNL2, GAK, PITPNM2, COG7, ZMIZ1, RBSN, NSMCE1, PLIN4, RUVBL1, TRIP10, PMEPA1, NEK6, CROT, PINX1	1.86394	0.1385	Winter_high
GOTERM_MF_DIRECT	GO:0017091~AU-rich element binding	4	0.00649341	EXOSC9, EXOSC4, MEX3D, HNRNPA0	10.1846	0.364362	Winter_high
GOTERM_MF_DIRECT	GO:0031625~ubiquitin protein ligase binding	15	0.00698324	MFN2, TRIOBP, TNFRSF1B, SCAMP3, TOLLIP, SMAD6, TRIM28, TRIB3, UBE2I, ERLIN1, RANGAP1, SKI, NGFR, STUB1, NAE1	2.26226	0.355116	Winter_high
GOTERM_BP_DIRECT	GO:0040008~regulation of growth	6	0.00742101	PPP2R1A, TGFBR2, SHC1, DMAP1, RUVBL1, KAT5	4.88684	0.883331	Winter_high
GOTERM_BP_DIRECT	GO:0001765~membrane raft assembly	3	0.00751106	FLOT2, S100A10, RFTN1	21.5835	0.850843	Winter_high
GOTERM_MF_DIRECT	GO:0070491~repressing transcription factor binding	5	0.00827021	SKI, KAT5, TCF3, MYC, NOC2L	6.18352	0.376625	Winter_high
Category	Term	Count	PValue	Genes	Fold Enrichment	Benjamini	cluster
GOTERM_BP_DIRECT	GO:0055114~oxidation-reduction process	62	5.17482e-19	ALDH8A1, TM7SF2, SC5D, ALDH1L1, CYP2C18, HMGCR, HIBADH, GLDC, CYP3A43, CRYL1, MSRA, AKR7A3, SRD5A1, ASPH, SRD5A2, HPD, RNLS, CYP1A1, CYP1A2, CDO1, TECR, RDH5, ALDH7A1, G6PD, HSD11B1, CYP2A7, PRODH, HSD17B11, PHYHD1, SORD, HSD3B7, FDX1, AASS, PAH, KMO, PIPOX, SESN3, FMO5, ERO1B, FASN, HAAO, ALDH4A1, DMGDH, HSD17B7, CHDH, MSMO1, CYP2C9, PYROXD2, SCD, MAOA, MAOB, IDO2, HGD, CRYZ, MSRB2, IYD, RDH11, …	3.74175	1.15295e-15	Winter_low
GOTERM_CC_DIRECT	GO:0005759~mitochondrial matrix	38	1.40764e-13	ETNPPL, ACADSB, MCL1, FDX1, ETHE1, AASS, AGXT, HIBADH, ACSF2, GLDC, GLS2, IDH3G, IVD, NARS2, DMGDH, ALDH4A1, ACAD8, DHTKD1, FH, GCDH, SUOX, FECH, OTC, PDK4, DECR1, CPS1, LACTB2, SIRT3, DBT, ALDH7A1, HYKK, ALDH1B1, ABAT, PCCB, OAT, PCCA, PMPCB, PRODH	4.32199	4.50484e-11	Winter_low
GOTERM_CC_DIRECT	GO:0005789~endoplasmic reticulum membrane	63	1.27753e-12	TM7SF2, SC5D, CYP2C18, SGPP1, HMGCR, LSS, CYP3A43, SLC35D1, BOK, INSIG1, ERAP2, SRD5A1, ELOVL6, SRD5A2, ASPH, PCYT2, SAR1B, HPD, SGPL1, STS, CYP1A1, VTI1B, CYP1A2, SIGMAR1, TECR, PNPLA3, RDH5, SCAP, G6PC, DGAT2, VAMP7, HSD11B1, CYP2A7, ARL6IP1, HSD3B7, SLC37A4, LMAN1, FMO5, ERO1B, TMEM33, CERS2, SERINC1, SEC22C, ACSL4, HSD17B7, ACSL5, MOGAT3, REEP6, RAB2B, EBP, MOGAT2, MSMO1, CYP2C9, SCD, TMBIM6,…	2.7182	1.3627e-10	Winter_low
GOTERM_CC_DIRECT	GO:0005739~mitochondrion	83	8.7729e-13	KYNU, ALDH1L1, TRMT2B, PINK1, ECHDC2, NIPSNAP3B, ECHDC3, FOXO3, PTEN, HIBADH, GLDC, MTFR1, MSRA, STARD4, IDH3G, DYNLL2, BOK, NARS2, CAT, ACAD8, DHTKD1, RMND1, SUOX, FECH, CYP1A1, ACO1, OTC, DECR1, SYNJ2BP, TAT, COQ5, DDIT4, ATP6V1A, ALDH7A1, SLC25A32, DGAT2, ALDH1B1, CLIC4, SDS, ABAT, PCCB, OAT, MTFMT, MDH1, PRODH, MAVS, ACADSB, MCL1, FDX1, UNG, ETHE1, AASS, COMT, GLS2, KRAS, IVD, PPL, FASN, RAB1…	2.31925	1.40368e-10	Winter_low
GOTERM_MF_DIRECT	GO:0030170~pyridoxal phosphate binding	17	2.05232e-12	ETNPPL, SHMT1, SGPL1, DDC, KYNU, ACCS, AGXT, TAT, GLDC, CTH, SDS, SRR, KYAT1, ABAT, GPT, THNSL2, OAT	10.6894	1.76092e-09	Winter_low
GOTERM_CC_DIRECT	GO:0005777~peroxisome	20	3.60337e-11	HACL1, AMACR, TKT, AKAP11, PEX3, ISOC1, AGXT, PHYH, PIPOX, HAO1, BAAT, NUDT7, IDH1, PEX13, CAT, URAD, ACAD11, IDI1, RIDA, SCP2	7.15228	2.8827e-09	Winter_low
GOTERM_CC_DIRECT	GO:0005783~endoplasmic reticulum	57	1.81985e-10	TM7SF2, HMGCR, CPEB4, PEX3, BOK, APOE, AQP11, INSIG1, B3GALNT2, ERAP2, CAT, ASPH, ELOVL6, SAR1B, ZFYVE1, SGPL1, STS, ACO1, HLA-A, SIGMAR1, METTL7A, TECR, SCAP, NPC1, NPC2, DGAT2, ASS1, SLC38A9, SLC37A4, EDEM2, CPED1, TMEM50B, FMO5, ERO1B, CERS2, SLC30A1, TMEM33, PCSK9, SEC22C, PCSK6, HSD17B7, TMEM30A, ACSL5, EBP, MOGAT2, MSMO1, YIPF6, HTT, SCD, TMBIM6, DBI, MTTP, CIDEC, CNIH4, SPCS3, AGMO, MGST1	2.56031	1.16471e-08	Winter_low
GOTERM_MF_DIRECT	GO:0016491~oxidoreductase activity	27	6.36136e-11	SC5D, SORD, ALDH1L1, AASS, PIPOX, SESN3, ERO1B, FASN, DMGDH, ALDH4A1, SUOX, RNLS, MSMO1, CYP1A1, PYROXD2, CYP2C9, SCD, MAOA, MAOB, CYP1A2, CRYZ, TECR, IYD, ALDH7A1, ALDH1B1, HSD11B1, DCXR	4.8385	2.72903e-08	Winter_low
GOTERM_CC_DIRECT	GO:0005829~cytosol	141	6.96208e-09	ALDH8A1, NCBP2, ALDH1L1, CHMP5, FOXO3, ACSS2, AMOTL2, GLDC, TPK1, GSTM2, AQP11, MAT1A, SULT1A1, ASPG, AKR7A3, SULT1A2, DERA, FAS, SAR1B, GSTT2B, NUDT4, GSTT1, VTI1B, CDO1, TAT, DDIT4, DEPDC5, PNPLA5, ARPC1A, ARPC1B, PCCB, PCCA, MDH1, ARL6IP1, HSD17B11, RBP4, MCL1, GGCT, ASS1, ALDOB, PFKFB1, HMGCS1, KMO, PAH, SPC24, PPP1R3C, KRAS, HNMT, ASRGL1, GYS2, IDH1, FBXO4, FBXO3, GNMT, FH, ACY1, SPHK2, HTT,…	1.58192	3.71311e-07	Winter_low
GOTERM_CC_DIRECT	GO:0070062~extracellular exosome	123	2.03981e-08	ALDH8A1, TSPAN1, ALDH1L1, CHMP5, HBS1L, GGT1, FSTL1, GSTM2, TTR, APOE, AKR7A3, DERA, FAS, CFD, GSTT2B, HLA-A, GSTT1, METTL7A, ARPC1A, ARPC1B, NPC1, CDKL1, NPC2, VAMP7, ABAT, MDH1, RBP4, ACADSB, GGCT, ASS1, ALDOB, KMO, PAH, LMAN1, GALM, HNMT, PPL, SERINC1, APOC3, IDH1, FH, GPR155, ACY1, UPB1, MAOB, SLC6A13, ACACA, ACMSD, HGD, LGALS8, ATAD2, TKT, CRYZ, TAX1BP1, TNFSF10, RPE, LAMP2, GBE1, HEBP1, PON…	1.62739	9.32486e-07	Winter_low
GOTERM_BP_DIRECT	GO:0006695~cholesterol biosynthetic process	12	4.37197e-09	TM7SF2, EBP, MSMO1, G6PD, HMGCR, INSIG1, HMGCS1, ACLY, LSS, PRKAA2, IDI1, HSD17B7	11.2824	4.87036e-06	Winter_low
GOTERM_CC_DIRECT	GO:0005782~peroxisomal matrix	11	3.02364e-07	HAO1, HACL1, BAAT, AMACR, NUDT7, IDH1, CAT, SCP2, AGXT, PHYH, PIPOX	8.8937	1.20945e-05	Winter_low
GOTERM_BP_DIRECT	GO:0008203~cholesterol metabolic process	14	4.12531e-08	EBP, TNFSF4, FDX1, SCAP, CYP7B1, NPC1, NPC2, APOE, INSIG1, PON1, PCSK9, CAT, ANGPTL3, LIPC	7.35569	3.06368e-05	Winter_low
GOTERM_MF_DIRECT	GO:0009055~electron carrier activity	15	1.81149e-07	GCDH, ACADSB, FDX1, MAOB, CYP1A2, GLDC, IVD, HAAO, DMGDH, AKR7A3, ALDH4A1, SRD5A1, ACAD8, ASPH, ACAD11	5.97346	5.18073e-05	Winter_low
GOTERM_CC_DIRECT	GO:0031090~organelle membrane	13	3.47891e-06	TM7SF2, CYP1A1, CYP2C18, CYP2C9, CYP1A2, CYP3A43, FMO5, CYP7B1, SPCS3, CYP2A7, SRD5A1, SRD5A2, CYP8B1	5.5574	0.000123687	Winter_low
GOTERM_CC_DIRECT	GO:0005811~lipid particle	11	9.68239e-06	HSD17B11, DGAT2, ABHD5, LSS, ACSL4, SIGMAR1, METTL7A, PNPLA3, GAPDH, PNPLA5, CIDEC	6.19864	0.00030979	Winter_low
GOTERM_BP_DIRECT	GO:0006631~fatty acid metabolic process	11	1.45033e-06	SGPL1, CRYL1, ACADSB, BAAT, MSMO1, ABHD5, FASN, AACS, ANGPTL3, GPAM, ACSF2	7.55777	0.000538411	Winter_low
GOTERM_BP_DIRECT	GO:0006569~tryptophan catabolic process	6	1.91095e-06	KYNU, ACMSD, HAAO, IDO2, KYAT1, KMO	23.8184	0.000608042	Winter_low
GOTERM_BP_DIRECT	GO:0042632~cholesterol homeostasis	12	1.40321e-06	G6PC, NPC1, NPC2, DGAT2, APOE, APOC3, SLC37A4, LIPG, PCSK9, ANGPTL3, LIPC, MTTP	6.69894	0.000625074	Winter_low
GOTERM_BP_DIRECT	GO:0006520~cellular amino acid metabolic process	10	1.21254e-06	GLS2, DDC, ACY1, SDS, SLC7A2, ASPG, SRR, GGT1, TAT, SLC25A15	8.93191	0.000675158	Winter_low
GOTERM_MF_DIRECT	GO:0005506~iron ion binding	17	5.83382e-06	SC5D, MSMO1, CYP1A1, CYP2C9, CYP2C18, FDX1, ETHE1, SCD, PAH, CYP1A2, CYP4V2, CYP3A43, CYP7B1, HAAO, CYP2A7, AGMO, CYP8B1	3.98231	0.00083389	Winter_low
GOTERM_MF_DIRECT	GO:0004497~monooxygenase activity	11	4.00579e-06	CYP3A43, CYP7B1, CYP1A1, CYP2C9, CYP2C18, AGMO, CYP2A7, PAH, CYP4V2, CYP1A2, CYP8B1	6.79739	0.000858875	Winter_low
GOTERM_MF_DIRECT	GO:0003824~catalytic activity	19	5.42624e-06	ALDH1L1, ACCS, AMACR, ECHDC1, ECHDC2, TKT, ECHDC3, ISOC1, ACSS2, ACSF2, PBLD, FASN, KYAT1, TGM3, ACSL4, PCYT2, FAHD2A, PMPCB, FH	3.6222	0.000930711	Winter_low
GOTERM_BP_DIRECT	GO:0006641~triglyceride metabolic process	9	4.22808e-06	G6PC, APOE, APOC3, INSIG1, SLC37A4, PCSK9, CAT, ACSL4, MTTP	9.18711	0.00117683	Winter_low
GOTERM_BP_DIRECT	GO:0008152~metabolic process	18	4.8875e-06	AQP9, ACO1, ECHDC1, ECHDC2, TKT, ECHDC3, ISOC1, ACSS2, ACSF2, GSTM2, DBT, INSIG1, FASN, UGT8, ACSL4, SCP2, FAHD2A, UGP2	3.82796	0.0012092	Winter_low
GOTERM_BP_DIRECT	GO:0051289~protein homotetramerization	11	5.6602e-06	SHMT1, CTH, MAT1A, ACACA, SRR, CAT, DECR1, GNMT, ACACB, CRYZ, DCXR	6.55007	0.0012603	Winter_low
GOTERM_BP_DIRECT	GO:0006559~L-phenylalanine catabolic process	6	6.68862e-06	ASRGL1, KYAT1, HGD, PAH, TAT, HPD	19.4878	0.00135384	Winter_low
GOTERM_BP_DIRECT	GO:0006629~lipid metabolic process	17	8.456e-06	SC5D, LCN12, ABHD5, TTPA, HMGCS1, ACLY, MID1IP1, TECR, MTTP, G6PD, LIPG, PLCD3, ACAD8, ACSL4, AACS, LIPC, THRSP	3.8686	0.00156877	Winter_low
GOTERM_BP_DIRECT	GO:0055088~lipid homeostasis	9	1.00199e-05	GCDH, ACADSB, IVD, ACACA, ACAD8, ACAD11, ANGPTL3, PNPLA3, PNPLA5	8.24484	0.00171579	Winter_low
GOTERM_MF_DIRECT	GO:0000062~fatty-acyl-CoA binding	8	1.44838e-05	GCDH, ACADSB, IVD, ACAD8, ACAD11, DBI, SCP2, ACBD4	9.55754	0.00177373	Winter_low
GOTERM_BP_DIRECT	GO:0006554~lysine catabolic process	6	1.12031e-05	SLC25A21, GCDH, ALDH7A1, HYKK, AASS, PIPOX	17.8638	0.00178132	Winter_low
GOTERM_BP_DIRECT	GO:0006633~fatty acid biosynthetic process	10	1.2119e-05	SC5D, MSMO1, ACACA, FASN, ACLY, AGMO, PRKAA2, ACACB, LIPC, PCCB	6.8707	0.00179847	Winter_low
GOTERM_BP_DIRECT	GO:0009058~biosynthetic process	8	1.478e-05	ALDH1L1, ACCS, FASN, KYAT1, PCYT2, TAT, MTFMT, PBLD	9.52738	0.00205601	Winter_low
GOTERM_BP_DIRECT	GO:0035338~long-chain fatty-acyl-CoA biosynthetic process	9	1.78608e-05	SCD, ACACA, FASN, ACLY, ELOVL6, ACSL4, TECR, ACSF2, ACSL5	7.65593	0.0023381	Winter_low
GOTERM_MF_DIRECT	GO:0016597~amino acid binding	7	2.30322e-05	DDC, SHMT1, ASS1, OTC, PAH, TAT, AGXT	11.4039	0.00246718	Winter_low
GOTERM_CC_DIRECT	GO:0030176~integral component of endoplasmic reticulum membrane	12	0.000109331	TM7SF2, ARL6IP1, SGPL1, G6PC, DGAT2, TMEM33, SARAF, SLC37A4, ELOVL6, ASPH, TECR, ESYT1	4.29137	0.00317566	Winter_low
GOTERM_MF_DIRECT	GO:0042803~protein homodimerization activity	41	3.70374e-05	KYNU, MCL1, GGCT, HMGCR, ACCS, HMGCS1, AGXT, GCH1, GSTM2, CRYL1, CEP57, BOK, APOE, SRR, FASN, ABCB10, KYAT1, IDH1, GYS2, FBXO4, CAT, THRSP, SHMT1, MSH3, MAOB, TKT, IL6R, PFKM, LHPP, HOMER2, RPE, G6PD, DGAT2, SDS, IKBKG, PON1, ABAT, RIDA, IKBKB, MGST1, SRGAP2	2.01297	0.00352473	Winter_low
GOTERM_CC_DIRECT	GO:0005741~mitochondrial outer membrane	14	0.000193263	MAVS, MCL1, ASS1, BOK, MAOA, RMDN3, MAOB, PINK1, KMO, ACACB, ACSL4, GPAM, MGST1, ACSL5	3.49453	0.00514093	Winter_low
GOTERM_BP_DIRECT	GO:0042493~response to drug	23	4.75153e-05	SORD, FECH, ASS1, CYP1A1, OTC, MAOB, HMGCS1, COMT, ACACB, CPS1, PTEN, NPC1, SLC1A2, SRR, ADRA1A, ABAT, SRD5A1, CAT, SRD5A2, AACS, CPB2, MGST1, ABCC6	2.70308	0.00586422	Winter_low
GOTERM_BP_DIRECT	GO:0019433~triglyceride catabolic process	7	5.18196e-05	APOE, APOC3, FABP7, CPS1, LIPC, PNPLA3, PNPLA5	10.0037	0.00605827	Winter_low
GOTERM_BP_DIRECT	GO:0006805~xenobiotic metabolic process	11	6.03386e-05	ACY1, NR1I2, CYP2C9, CYP2C18, SULT1A1, AKR7A3, SULT1A2, GGT1, CYP1A2, MGST1, AHR	5.03852	0.00669938	Winter_low
GOTERM_MF_DIRECT	GO:0016627~oxidoreductase activity, acting on the CH-CH group of donors	6	0.000103925	TM7SF2, GCDH, IVD, ACAD8, ACAD11, TECR	11.9469	0.0088776	Winter_low
GOTERM_BP_DIRECT	GO:0006099~tricarboxylic acid cycle	7	0.000126426	MDH1B, IDH3G, ACO1, IDH1, DHTKD1, MDH1, FH	8.62392	0.0133244	Winter_low
GOTERM_BP_DIRECT	GO:0005977~glycogen metabolic process	7	0.000126426	G6PC, PPP1R3C, GBE1, PPP1R3B, SLC37A4, GNMT, UGP2	8.62392	0.0133244	Winter_low
GOTERM_BP_DIRECT	GO:0006749~glutathione metabolic process	9	0.000152698	GSTM2, GSTT2B, G6PD, CLIC4, ETHE1, GSTT1, IDH1, GGT1, MGST1	5.74195	0.0153463	Winter_low
GOTERM_BP_DIRECT	GO:0008202~steroid metabolic process	8	0.000170984	G6PC, MSMO1, NR1I2, CYP1A1, CYP2C9, SULT1A1, SLC37A4, SULT1A2	6.64701	0.0157491	Winter_low
GOTERM_BP_DIRECT	GO:0006071~glycerol metabolic process	5	0.000169608	MOGAT3, MOGAT2, DGAT2, TKFC, ANGPTL3	16.2398	0.016297	Winter_low
GOTERM_BP_DIRECT	GO:0007584~response to nutrient	10	0.000211607	ASS1, HMGCR, PKLR, SLC37A4, LIPG, TTPA, ENSA, ACSL4, AACS, PTEN	4.82806	0.0173117	Winter_low
GOTERM_BP_DIRECT	GO:0006094~gluconeogenesis	8	0.000198501	RBP4, G6PC, SDS, SLC25A10, PFKFB1, ALDOB, GAPDH, MDH1	6.49594	0.0175366	Winter_low
GOTERM_BP_DIRECT	GO:0031325~positive regulation of cellular metabolic process	4	0.000207609	ACACA, FASN, ACLY, ACACB	28.5821	0.017635	Winter_low
GOTERM_BP_DIRECT	GO:0006699~bile acid biosynthetic process	6	0.000233734	CYP7B1, BAAT, HSD3B7, AMACR, CYP8B1, SCP2	10.2079	0.0184288	Winter_low
GOTERM_MF_DIRECT	GO:0015171~amino acid transmembrane transporter activity	8	0.000297426	SLC1A5, SLC38A4, SLC1A2, SLC38A9, SLC16A10, SLC7A2, SLC6A12, PEX3	6.10056	0.0229356	Winter_low
GOTERM_MF_DIRECT	GO:0050660~flavin adenine dinucleotide binding	9	0.000383547	GCDH, CHDH, FMO5, ACADSB, IVD, MAOB, KMO, ACAD8, ACAD11	5.04011	0.0232363	Winter_low
GOTERM_MF_DIRECT	GO:0050661~NADP binding	7	0.000368688	TM7SF2, FMO5, G6PD, HMGCR, IDH1, CAT, GAPDH	7.16815	0.0240441	Winter_low
GOTERM_MF_DIRECT	GO:0008483~transaminase activity	5	0.000347307	ETNPPL, ABAT, KYAT1, OAT, AGXT	13.7849	0.0245308	Winter_low
GOTERM_MF_DIRECT	GO:0020037~heme binding	13	0.000451135	SUOX, CYP1A1, CYP2C18, CYP2C9, IDO2, CYP1A2, CYP4V2, CYP3A43, CYP7B1, HEBP1, CYP2A7, CAT, CYP8B1	3.40095	0.0254805	Winter_low
GOTERM_BP_DIRECT	GO:0055089~fatty acid homeostasis	5	0.000351487	DGAT2, APOE, PRKAA2, GPAM, NR1H4	13.7414	0.0266472	Winter_low
GOTERM_BP_DIRECT	GO:0042866~pyruvate biosynthetic process	4	0.000406598	SDS, PKLR, SRR, AGXT	23.8184	0.0297513	Winter_low
GOTERM_BP_DIRECT	GO:0010043~response to zinc ion	7	0.000439394	ASS1, SLC30A1, OTC, HAAO, CA2, CPS1, PTEN	6.94704	0.0301361	Winter_low
GOTERM_BP_DIRECT	GO:0051384~response to glucocorticoid	9	0.000435864	ALPL, SDC1, KRAS, HNMT, PFKFB1, FAS, CDO1, TAT, AGXT	4.94691	0.030847	Winter_low
GOTERM_MF_DIRECT	GO:0070402~NADPH binding	5	0.00063432	HMGCR, FASN, SRD5A1, DECR1, CRYZ	11.9469	0.0334538	Winter_low
GOTERM_MF_DIRECT	GO:0052890~oxidoreductase activity, acting on the CH-CH group of donors, with a flavin as acceptor	5	0.00063432	GCDH, ACADSB, IVD, ACAD8, ACAD11	11.9469	0.0334538	Winter_low
GOTERM_BP_DIRECT	GO:0042593~glucose homeostasis	11	0.000520934	RBP4, G6PC, ERO1B, PDK4, SLC37A4, ADRA1B, PRKAA2, PFKM, SIDT2, NR1H4, SESN3	3.89113	0.0345685	Winter_low
GOTERM_BP_DIRECT	GO:0003333~amino acid transmembrane transport	6	0.000556549	SLC1A5, SLC38A4, SLC38A9, SLC16A10, SLC6A12, PEX3	8.57464	0.0358231	Winter_low
GOTERM_MF_DIRECT	GO:0003995~acyl-CoA dehydrogenase activity	5	0.000827266	GCDH, ACADSB, IVD, ACAD8, ACAD11	11.2002	0.0409095	Winter_low
GOTERM_MF_DIRECT	GO:0015485~cholesterol binding	7	0.000887119	NPC1, STARD4, NPC2, APOE, APOC3, SCP2, SCAP	6.11915	0.0414224	Winter_low
GOTERM_BP_DIRECT	GO:0046487~glyoxylate metabolic process	6	0.000673397	HAO1, DBT, GNMT, DHTKD1, AGXT, GLDC	8.24484	0.0419746	Winter_low
GOTERM_BP_DIRECT	GO:0008652~cellular amino acid biosynthetic process	6	0.000673397	GLS2, ASPG, KYAT1, GPT, PAH, OAT	8.24484	0.0419746	Winter_low
GOTERM_BP_DIRECT	GO:0019432~triglyceride biosynthetic process	6	0.000673397	MOGAT3, MOGAT2, DGAT2, AGMO, PNPLA3, GPAM	8.24484	0.0419746	Winter_low
GOTERM_BP_DIRECT	GO:0001561~fatty acid alpha-oxidation	4	0.000696795	HAO1, HACL1, PEX13, PHYH	20.4158	0.0422217	Winter_low
GOTERM_MF_DIRECT	GO:0004029~aldehyde dehydrogenase (NAD) activity	5	0.00105818	ALDH8A1, ALDH7A1, ALDH1L1, ALDH1B1, ALDH4A1	10.5414	0.0466854	Winter_low
GOTERM_BP_DIRECT	GO:0008206~bile acid metabolic process	5	0.000837048	SLCO1B3, NPC1, BAAT, AMACR, NR1H4	11.1649	0.0491748	Winter_low
GOTERM_BP_DIRECT	GO:0001889~liver development	9	0.00104625	BAAT, KRAS, ASS1, OTC, ARID5B, HMGCS1, PCSK9, SRD5A1, AACS	4.34526	0.05953	Winter_low
GOTERM_BP_DIRECT	GO:0042135~neurotransmitter catabolic process	4	0.00109179	MAOA, MAOB, ABAT, COMT	17.8638	0.0604988	Winter_low
GOTERM_MF_DIRECT	GO:0016620~oxidoreductase activity, acting on the aldehyde or oxo group of donors, NAD or NADP as acceptor	5	0.00164895	ALDH8A1, ALDH7A1, ALDH1L1, ALDH4A1, GAPDH	9.43178	0.0683503	Winter_low
GOTERM_MF_DIRECT	GO:0016829~lyase activity	6	0.00177187	HACL1, KYAT1, ACLY, THNSL2, GLDC, FH	6.72014	0.0698951	Winter_low
GOTERM_BP_DIRECT	GO:0019373~epoxygenase P450 pathway	5	0.00134637	CYP1A1, CYP2C9, CYP2C18, CYP2A7, CYP1A2	9.92435	0.0722967	Winter_low
GOTERM_BP_DIRECT	GO:0033539~fatty acid beta-oxidation using acyl-CoA dehydrogenase	5	0.00134637	GCDH, ACADSB, IVD, ACAD8, ACAD11	9.92435	0.0722967	Winter_low
GOTERM_CC_DIRECT	GO:0005778~peroxisomal membrane	7	0.00314224	MAVS, HMGCR, PEX13, CAT, PEX3, ACSL4, MGST1	4.82116	0.0745444	Winter_low
GOTERM_BP_DIRECT	GO:0001523~retinoid metabolic process	8	0.00150391	RDH11, TTR, RBP4, SDC1, APOE, APOC3, CYP4V2, RDH5	4.68559	0.0785308	Winter_low
GOTERM_BP_DIRECT	GO:0006544~glycine metabolic process	4	0.00160383	SHMT1, SLC25A32, BAAT, DMGDH	15.879	0.0816234	Winter_low
GOTERM_CC_DIRECT	GO:0031966~mitochondrial membrane	9	0.00376242	MAVS, SLC25A32, SORD, BOK, IVD, SLC25A10, TMBIM6, ACAD11, GRAMD4	3.56092	0.0825529	Winter_low
GOTERM_BP_DIRECT	GO:0009083~branched-chain amino acid catabolic process	5	0.0016681	DBT, ACADSB, IVD, ACAD8, HIBADH	9.40202	0.0828673	Winter_low
GOTERM_MF_DIRECT	GO:0003989~acetyl-CoA carboxylase activity	3	0.00227782	ACACA, ACACB, PCCB	35.8408	0.085096	Winter_low
GOTERM_BP_DIRECT	GO:0006694~steroid biosynthetic process	6	0.00179646	HSD17B11, HSD3B7, SRD5A1, LSS, SRD5A2, SCP2	6.69894	0.0870262	Winter_low
GOTERM_MF_DIRECT	GO:0016787~hydrolase activity	14	0.00273828	NDST1, NUDT4, ABHD5, ACMSD, PNPLA3, RBBP9, PNPLA5, NUDT7, ASRGL1, ENTPD4, LYPLAL1, IDI1, NT5E, FAHD2A	2.62707	0.0972323	Winter_low
GOTERM_BP_DIRECT	GO:0019805~quinolinate biosynthetic process	3	0.00229209	KYNU, HAAO, KMO	35.7277	0.107398	Winter_low
GOTERM_BP_DIRECT	GO:0071400~cellular response to oleic acid	3	0.00229209	ASS1, DGAT2, CPS1	35.7277	0.107398	Winter_low
GOTERM_BP_DIRECT	GO:0050746~regulation of lipoprotein metabolic process	3	0.00229209	ANGPTL8, DGAT2, LIPG	35.7277	0.107398	Winter_low
GOTERM_BP_DIRECT	GO:0043420~anthranilate metabolic process	3	0.00229209	KYNU, HAAO, KMO	35.7277	0.107398	Winter_low
GOTERM_BP_DIRECT	GO:0016125~sterol metabolic process	5	0.00246447	CYP7B1, EBP, FDX1, CYP4V2, CYP8B1	8.50659	0.112648	Winter_low
GOTERM_BP_DIRECT	GO:0045471~response to ethanol	10	0.00269404	RBP4, G6PD, FECH, HMGCR, MAOB, ABAT, CAT, AACS, CDO1, PTEN	3.40263	0.120042	Winter_low
GOTERM_MF_DIRECT	GO:0051287~NAD binding	6	0.00385264	IDH3G, SORD, IDH1, GAPDH, HIBADH, MDH1	5.65907	0.1289	Winter_low
GOTERM_BP_DIRECT	GO:0006098~pentose-phosphate shunt	4	0.00302174	RPE, G6PD, DERA, TKT	12.9919	0.131052	Winter_low
GOTERM_CC_DIRECT	GO:0005765~lysosomal membrane	16	0.00734532	TSPAN1, SLC38A9, SPHK2, VTI1B, TRIM23, SIDT2, TMEM55B, DEPDC5, SLC2A8, ATP6V1A, LAMP2, NPC1, ZFYVE26, AP3M1, ATP6V1E1, VAMP7	2.17179	0.145534	Winter_low
GOTERM_CC_DIRECT	GO:0005743~mitochondrial inner membrane	22	0.00842845	CHDH, FECH, OTC, MAOB, PDK4, PINK1, KMO, CPS1, SFXN5, SIRT3, SLC25A21, SLC25A32, BOK, SLC25A10, ABCB10, ACAD11, GPAM, SLC25A15, MGST1, ACSL5, SRGAP2, PRODH	1.85538	0.15573	Winter_low
GOTERM_MF_DIRECT	GO:0016705~oxidoreductase activity, acting on paired donors, with incorporation or reduction of molecular oxygen	7	0.00492887	CYP3A43, CYP7B1, CYP2C9, CYP2C18, CYP2A7, CYP4V2, CYP8B1	4.4015	0.155978	Winter_low
GOTERM_BP_DIRECT	GO:0000050~urea cycle	4	0.00394606	ASS1, OTC, CPS1, SLC25A15	11.9092	0.164546	Winter_low
GOTERM_BP_DIRECT	GO:0032259~methylation	8	0.00422136	HNMT, MAT1A, COMT, GNMT, CYP1A2, TPMT, METTL7A, COQ5	3.91536	0.171801	Winter_low
GOTERM_BP_DIRECT	GO:0006810~transport	20	0.0043822	AQP9, SLC6A12, SLC37A4, TTPA, ENSA, DBI, SLC10A1, TTR, ATP6V1A, TTPAL, SLC25A32, SLC7A2, CNIH4, VAMP7, SLC25A10, ABCB10, SEC22C, FABP7, SLC25A15, ABCC6	2.05331	0.17458	Winter_low
GOTERM_BP_DIRECT	GO:0006084~acetyl-CoA metabolic process	3	0.00449938	ACACA, FASN, ACACB	26.7957	0.175696	Winter_low
GOTERM_BP_DIRECT	GO:0034354~'de novo' NAD biosynthetic process from tryptophan	3	0.00449938	KYNU, HAAO, KMO	26.7957	0.175696	Winter_low
GOTERM_BP_DIRECT	GO:0070221~sulfide oxidation, using sulfide:quinone oxidoreductase	3	0.00449938	SUOX, SLC25A10, ETHE1	26.7957	0.175696	Winter_low
GOTERM_BP_DIRECT	GO:0051262~protein tetramerization	6	0.0048906	SHMT1, HMGCR, AASS, TGM3, CAT, FH	5.35915	0.186243	Winter_low
GOTERM_MF_DIRECT	GO:0070330~aromatase activity	5	0.006264	CYP3A43, CYP1A1, CYP2C18, CYP2A7, CYP1A2	6.63718	0.187275	Winter_low
GOTERM_BP_DIRECT	GO:0070328~triglyceride homeostasis	5	0.00551468	ANGPTL8, APOE, APOC3, ANGPTL3, LIPC	6.8707	0.204004	Winter_low
GOTERM_BP_DIRECT	GO:0061621~canonical glycolysis	5	0.00551468	PFKFB1, ALDOB, PKLR, PFKM, GAPDH	6.8707	0.204004	Winter_low
GOTERM_MF_DIRECT	GO:0004075~biotin carboxylase activity	3	0.00731557	ACACA, ACACB, PCCA	21.5045	0.208106	Winter_low
GOTERM_MF_DIRECT	GO:0016831~carboxy-lyase activity	4	0.00760269	DDC, SGPL1, ECHDC1, URAD	9.55754	0.208526	Winter_low
GOTERM_MF_DIRECT	GO:0016594~glycine binding	4	0.00760269	CEP104, SRR, GNMT, GLDC	9.55754	0.208526	Winter_low
GOTERM_BP_DIRECT	GO:0006768~biotin metabolic process	4	0.00626347	ACACA, ACACB, PCCB, PCCA	10.2079	0.224716	Winter_low
GOTERM_BP_DIRECT	GO:0008610~lipid biosynthetic process	4	0.00626347	ACLY, PRKAA2, ACSL4, ACSS2	10.2079	0.224716	Winter_low
GOTERM_BP_DIRECT	GO:0007568~aging	12	0.00671445	CYP1A1, ASS1, HMGCR, SRR, ADRA1A, ABAT, FBXO4, CAT, FOXO3, PTEN, SCAP, SIRT3	2.59838	0.235123	Winter_low
GOTERM_MF_DIRECT	GO:0048037~cofactor binding	4	0.00916625	HACL1, ACLY, TKT, PHYH	8.96019	0.238485	Winter_low
GOTERM_MF_DIRECT	GO:0019825~oxygen binding	6	0.00960375	CYP1A1, CYP2C9, CYP2C18, CYP2A7, CYP1A2, CYP8B1	4.57542	0.241183	Winter_low
Category	Term	Count	PValue	Genes	Fold Enrichment	Benjamini	cluster
GOTERM_BP_DIRECT	GO:0007031~peroxisome organization	6	8.17303e-06	PEX11A, LONP2, PEX1, PEX19, PEX14, ABCD3	20.2802	0.0115064	Cold_high_EH
GOTERM_MF_DIRECT	GO:0005515~protein binding	184	1.39364e-05	CAST, SEPT5, SMLR1, TSPO, THRA, LMO2, CROCC, PPP2R5A, EIF5, TRAPPC2L, USE1, CBX4, FGF13, VPS51, TNFSF12, KIAA0319L, TBC1D19, SART1, BBOX1, CSNK2A2, GET4, TBC1D17, APOA1, DDX11, CUL7, ANK3, ATXN10, ASMTL, ATG7, LCAT, SRRM1, WWOX, MAP2K5, ARGLU1, H1F0, MCRS1, CIZ1, POLG, PICK1, ANAPC4, MTA3, STAP2, HMG20B, PIM3, CHRAC1, RFC5, PNKP, PGLS, CHID1, SMARCE1, UBL4A, ASB3, RAB13, SCAF8, SSC5D, STK16, PAM,…	1.24059	0.00706858	Cold_high_EH
GOTERM_CC_DIRECT	GO:0005778~peroxisomal membrane	7	0.000201993	PEX11A, ACSL1, PEX1, PEX19, PEX14, ABCD3, SLC27A2	8.17429	0.0622202	Cold_high_EH
GOTERM_CC_DIRECT	GO:0005737~cytoplasm	109	0.000671792	CAST, TSPO, CROCC, PPP2R5A, PTGS1, EIF5, TRAPPC2L, FGF13, SART1, FAHD1, GET4, DDX11, CUL7, ATXN10, ASMTL, ATG7, WWOX, MAP2K5, NUDT16, MCRS1, PICK1, MTA3, KRT10, PIM3, SCYL1, UBL4A, ASB3, RAB13, SSC5D, ANAPC16, STK16, TDRD3, GLUD1, PTH1R, UBE2V1, ASAP3, CXXC5, HEXDC, TPGS1, FAM213A, ARPC2, NAGA, RPL3, SEPT10, NTN1, ABCB4, APEH, UBE2E3, SRSF5, HDAC3, UACA, AKTIP, DMTF1, GLMN, CIRBP, QPRT, TNK2, TP5…	1.31624	0.10134	Cold_high_EH
GOTERM_CC_DIRECT	GO:0005794~Golgi apparatus	27	0.00126846	FGFRL1, PTGS1, LMF1, VPS51, FES, SLC26A11, SART1, ST6GALNAC6, PKN3, CUL7, ARPC2, ALB, ANK3, WWOX, H1F0, ZP2, PICK1, GALT, TMEM5, HDAC3, PDE2A, PSEN1, AKTIP, SCYL1, LARP7, RAB13, YIPF1	1.97287	0.125884	Cold_high_EH
GOTERM_CC_DIRECT	GO:0005829~cytosol	74	0.0014315	CAST, ALAD, THRA, EIF5, TRAPPC2L, VPS51, FES, SART1, BBOX1, FAHD1, CSNK2A2, GET4, TRAPPC6A, TBC1D17, MCM7, NISCH, APOA1, PRMT2, CUL7, PEX1, ANK3, ATXN10, GSN, ATG7, SRRM1, WWOX, MAP2K5, STAP2, ANAPC4, PKN1, GRHPR, TYK2, BBS2, COPG2, PGLS, EPB41L1, PANK1, UBL4A, SIAH1, DHPS, ANAPC16, BBS5, STX8, EXOC7, HAUS1, UBE2V1, CTPS2, BEX3, PPCDC, FBF1, SHQ1, PLIN5, PEX19, ARPC2, EXOC4, HNRNPD, RPL3, ABCD3, …	1.40765	0.10764	Cold_high_EH
GOTERM_MF_DIRECT	GO:0031418~L-ascorbic acid binding	4	0.00500659	PAM, EGLN2, ALKBH3, OGFOD3	11.2822	0.721232	Cold_high_EH
GOTERM_CC_DIRECT	GO:0005777~peroxisome	7	0.00616415	PEX11A, FIS1, LONP2, PEX1, PEX19, PEX14, ABCD3	4.24434	0.325142	Cold_high_EH
GOTERM_CC_DIRECT	GO:0005783~endoplasmic reticulum	24	0.00635941	CAST, FKBP9, STX8, ZP2, ATL2, ZDHHC6, TRAPPC2L, USE1, SLC26A11, MAN1C1, STAU2, STAU1, TRAPPC6A, MARCH2, FIS1, PLEKHF2, PDE2A, PSEN1, ALB, ANK3, TOR1A, SUMF1, SIL1, LRP5	1.82779	0.286894	Cold_high_EH
GOTERM_BP_DIRECT	GO:0006625~protein targeting to peroxisome	3	0.00701063	LONP2, PEX1, PEX19	22.8152	0.993133	Cold_high_EH
GOTERM_BP_DIRECT	GO:2000781~positive regulation of double-strand break repair	3	0.00701063	NUDT16, DDX11, SPIDR	22.8152	0.993133	Cold_high_EH
GOTERM_CC_DIRECT	GO:0016020~membrane	50	0.00809961	CAST, ATL2, PPP2R5A, TNFSF12, VPS51, SLC1A4, TSPAN12, LONP2, NISCH, MCM7, ATXN10, ANO10, PTDSS2, LAS1L, KRT10, IL11RA, OGFOD3, TYK2, EMC8, PNKP, BBS2, CHID1, SCYL1, PSEN1, UBL4A, SSC5D, STK16, PAM, EXOC7, PTH1R, GPAA1, STAU2, STAU1, FIS1, ACSL1, FMO2, TOR1A, EXOC4, PEX14, ABCD3, ECI2, ABCB8, SYT12, SPPL2B, RFNG, MAN1C1, ABCB4, PHB2, RHOT2, TNK2	1.43316	0.308887	Cold_high_EH
Category	Term	Count	PValue	Genes	Fold Enrichment	Benjamini	cluster
GOTERM_CC_DIRECT	GO:0005765~lysosomal membrane	13	1.10812e-05	VASN, CLN3, VPS41, ANPEP, CTSA, STARD3, LRP1, ECE1, GNB2, KXD1, GAA, VPS11, CLCN7	5.02699	0.00272227	Cold_high_EM
GOTERM_CC_DIRECT	GO:0043202~lysosomal lumen	8	1.51099e-05	GPC4, MAN2B2, TXNDC5, SMPD1, GAA, CTSA, AGRN, PLBD2	9.97209	0.00185681	Cold_high_EM
GOTERM_CC_DIRECT	GO:0016020~membrane	41	2.5541e-05	GALNT2, PRKCZ, NRBP1, SLC39A11, STK11, MAN1B1, MLH1, INTS1, CTSA, ESYT2, HNRNPL, BAG6, ECE1, PCBP1, PCBP2, EDC3, PEX16, RPN1, MGLL, PARD3B, ACTB, CLN3, SLC12A9, PIGT, CDK9, PNPLA2, VPS41, SGTA, DCTN1, CLPTM1, GNB2, TSC2, SNRNP200, KREMEN1, GAA, GNAS, MYH14, PLA2G4C, POFUT1, CLCN7, PYGB	1.97459	0.00209219	Cold_high_EM
GOTERM_MF_DIRECT	GO:0005515~protein binding	116	5.34794e-05	A2M, NRBP1, THOP1, LTBP4, TSSC4, MYLIP, STARD3, TBC1D16, UNC5B, CDKN2D, GATA4, MAP3K8, RPN1, RARA, AKIRIN1, TMUB2, TBC1D9B, PLD3, AP5Z1, RNF220, VPS41, RAD9A, DCTN4, DCTN1, TRAPPC12, JUP, MAP4K4, PIAS3, TXNDC5, MAPK3, VAMP3, LRCH4, FIP1L1, STK11, RAD23A, CIART, SETD1A, PPIL2, ITGB5, ZMYND8, HNRNPL, ECE1, FBXW8, RNF168, AGRN, TRAF6, UNC119, MAP2K2, KLF11, TAF7, ADPRH, TMEM115, CORO1B, TMEM8B, TSC2…	1.28845	0.0196458	Cold_high_EM
GOTERM_CC_DIRECT	GO:0070062~extracellular exosome	44	0.000624787	GALNT2, TF, PRKCZ, A2M, STK11, CPQ, LTBP4, ITGB5, ANPEP, CTSA, PLBD2, HNRNPL, GPC4, ANGPTL6, SIAE, ECE1, MAN2B2, SERPINA7, PCBP1, PCBP2, AGRN, DPP7, ACTB, VASN, PLD3, CES2, SLC12A9, HDAC11, UBL3, AMBP, JUP, CORO1B, GNB2, GRN, ARF3, TXNDC5, MAPK3, SMPD1, GAA, TPRG1L, GNAS, MYH14, ADAM15, PYGB	1.65847	0.0377071	Cold_high_EM
GOTERM_CC_DIRECT	GO:0048471~perinuclear region of cytoplasm	16	0.000774441	INF2, PRKCZ, TF, GALNT2, NRBP1, MAP2K2, ANGEL1, CORO1B, ECE1, FBXW8, GNB2, ARF3, TSC2, GNAS, RARA, TRAF6	2.72988	0.0373999	Cold_high_EM
GOTERM_CC_DIRECT	GO:0005654~nucleoplasm	43	0.000977468	FIP1L1, HNF1B, NRBP1, HNF1A, STK11, PPIL2, KMT2B, SETD1A, BAP1, INTS1, MLH1, CTSA, WBP11, HNRNPL, BAG6, PCBP1, CDKN2D, PCBP2, GATA4, RNF169, MGLL, RARA, RNF168, AKIRIN1, ACTB, RBM22, ZBTB7B, AP5Z1, LIG1, TAF7, CDK9, RAD9A, IRF2BP1, HNRNPA0, HNRNPUL1, PIAS3, POLDIP3, MAPK3, SNRNP200, ESRP2, PLA2G4C, CARM1, CSTF1	1.63649	0.0393026	Cold_high_EM
GOTERM_CC_DIRECT	GO:0005764~lysosome	9	0.00133884	CLN3, SIAE, CPQ, TSC2, SMPD1, GAA, CTSA, VPS11, DPP7	4.21939	0.0459909	Cold_high_EM
GOTERM_BP_DIRECT	GO:0000398~mRNA splicing, via spliceosome	9	0.00160006	HNRNPL, RBM22, FIP1L1, HNRNPUL1, PCBP1, PCBP2, SNRNP200, CSTF1, HNRNPA0	4.10094	0.802844	Cold_high_EM
GOTERM_CC_DIRECT	GO:0030529~intracellular ribonucleoprotein complex	7	0.00179857	ACTB, HNRNPL, HNRNPUL1, PCBP1, PCBP2, SNRNP200, HNRNPA0	5.45349	0.0538515	Cold_high_EM
GOTERM_MF_DIRECT	GO:0016874~ligase activity	10	0.00181929	PJA1, RNF220, PIAS3, LIG1, PPIL2, RNF169, RNF168, IRF2BP1, MYLIP, TRAF6	3.614	0.286652	Cold_high_EM
GOTERM_CC_DIRECT	GO:0005925~focal adhesion	11	0.00391277	ACTB, JUP, CORO1B, LRP1, GNB2, TLN2, MAP2K2, PCBP2, MAPK3, ITGB5, PARVB	2.98079	0.101617	Cold_high_EM
GOTERM_BP_DIRECT	GO:0007040~lysosome organization	4	0.0052437	CLN3, GAA, VPS11, MBTPS1	11.2396	0.930439	Cold_high_EM
GOTERM_CC_DIRECT	GO:0005911~cell-cell junction	7	0.005746	JUP, PRKCZ, CADM3, COL17A1, PARD3, TLN2, MAP2K2	4.31206	0.13217	Cold_high_EM
GOTERM_CC_DIRECT	GO:0005769~early endosome	8	0.00594983	TBC1D16, TF, CLN3, ECE1, MAP2K2, MAPK3, VPS41, VPS11	3.70143	0.124935	Cold_high_EM
GOTERM_BP_DIRECT	GO:0043277~apoptotic cell clearance	3	0.00926509	LRP1, TXNDC5, RARA	20.2313	0.956985	Cold_high_EM
Category	Term	Count	PValue	Genes	Fold Enrichment	Benjamini	cluster
GOTERM_MF_DIRECT	GO:0005515~protein binding	11	0.0084276	RLF, SSBP3, UBA1, CSRNP1, HCFC1, PRKACA, POM121C, CIC, CDC42EP4, ZBTB43, WIZ	1.76144	0.281126	Cold_high_EL
GOTERM_CC_DIRECT	GO:0005634~nucleus	9	0.00888838	RLF, SSBP3, UBA1, CSRNP1, HCFC1, PRKACA, CIC, ZBTB43, WIZ	2.32994	0.354337	Cold_high_EL
Category	Term	Count	PValue	Genes	Fold Enrichment	Benjamini	cluster
GOTERM_CC_DIRECT	GO:0005654~nucleoplasm	86	1.04318e-11	SRSF1, ZBTB34, TAF1D, SNIP1, ZNF12, RPS6KB1, NFKB1, SPRTN, SENP5, RLIM, PDHB, RNGTT, SETX, CBX5, TOP1, MAX, GTF2E1, PRMT5, CLP1, TARDBP, TIA1, CASP8, PMS2, ITFG2, LUC7L3, ZNF281, RBBP5, EMSY, RBL2, DFFB, HNRNPA2B1, TMEM70, RRP8, CDK7, UBE2B, PPP1CB, IPO7, MTF2, MED17, TESK2, KPNA4, ZNF436, SMARCAD1, HAUS3, CLUAP1, PPP4R2, SRSF10, ZBTB11, COPS7B, TTC5, IVNS1ABP, DDX47, ERCC6, METTL3, ZNF326, MORC3…	2.08501	2.50365e-09	Cold_low_EM
GOTERM_MF_DIRECT	GO:0044822~poly(A) RNA binding	43	1.83849e-07	SRSF1, RBM34, CRNKL1, SRSF10, FAM98A, SNIP1, NUFIP2, RSRC2, SMNDC1, ZFC3H1, TOP1, RBM4B, DDX47, CISD2, ZNF326, REXO4, TIA1, TARDBP, CDC40, HARS2, TFB2M, ZCCHC7, LUC7L3, RBM26, ZC3H15, ZC3H10, HNRNPA2B1, PPP1R10, YTHDC2, RRP8, NOA1, CSTF2T, RPF1, DDX6, TEFM, IFIT2, HNRNPH3, YWHAG, UPF3B, HNRNPUL2, PTCD2, HNRNPH1, GIGYF2	2.39904	6.4345e-05	Cold_low_EM
GOTERM_CC_DIRECT	GO:0005634~nucleus	116	3.31252e-06	CTDSPL, SNIP1, ZNF781, RPS6KB1, CLK1, SPRTN, NFXL1, PDHB, SMNDC1, SETX, CBX5, ATP2B1, TOP1, GTF2E1, ANKRD54, ASPA, ZNF182, CLP1, TARDBP, CLK4, PMS2, LUC7L3, RBL2, ZNF644, DFFB, TAZ, HNRNPA2B1, ZNF189, RRP8, PPP1CB, MTF2, MED17, TESK2, PDE4DIP, NFE2L2, PUS3, SRSF10, ZNF131, ANKRD30A, SESN1, TROVE2, ZNF324, METTL3, ZNF326, SPOP, DVL2, ZNF623, TM2D1, TAOK2, YTHDC2, ARMC1, DDX6, HNRNPH3, UPF3B, DNAJB…	1.4459	0.000397424	Cold_low_EM
GOTERM_MF_DIRECT	GO:0003677~DNA binding	50	1.62337e-05	ZBTB34, TAF1D, ZNF781, ZNF12, NFKB1, SPRTN, SETX, TOP1, ZNF182, PMS2, LUC7L3, ZNF282, ZNF644, ZNF280D, RBL2, DFFB, ZNF189, MTF2, NFE2L2, MSANTD4, ZNF33B, ZNF436, SMARCAD1, RABGAP1, LCORL, ZBTB6, ZNF131, ANKRD30A, ZNF75A, GON4L, TTC5, ERCC6, ZNF324, ZNF326, GTF3C2, ZNF623, ZMYM1, ZMYM4, RYBP, PPP1R10, POLR3A, RCAN1, ZFP3, ZNF668, POLR3D, STAT2, PREB, ZBED5, IRF1, PARP2	1.88139	0.00283689	Cold_low_EM
GOTERM_MF_DIRECT	GO:0003676~nucleic acid binding	34	3.73881e-05	SRSF1, SMARCAD1, RBM34, ZFP62, ZBTB34, SRSF10, ZBTB11, ZNF131, ZNF200, ZNF781, ZNF12, ZNF75A, RBM4B, DDX47, ZNF324, REXO4, TIA1, TARDBP, THAP1, ZCCHC7, RBM26, ZNF623, ZMYM1, ZNF282, ZNF644, HNRNPA2B1, ZNF189, YTHDC2, ZNF668, DDX6, HNRNPH3, ZNF33B, HNRNPH1, ZNF436	2.17423	0.00435252	Cold_low_EM
GOTERM_CC_DIRECT	GO:0005737~cytoplasm	104	0.000378142	METTL21A, PDLIM5, SNIP1, RPS6KB1, TXLNA, CLK1, SMNDC1, SETX, GTF2E1, ANKRD54, ASPA, CLP1, TIA1, TARDBP, PMS2, GDF9, RBL2, DFFB, HNRNPA2B1, RRP8, FADD, EIF2AK1, MTF2, CNTROB, TESK2, PDE4DIP, NFE2L2, EIF2AK3, SLC40A1, ZNF436, RTP3, SRSF10, COPS7B, AKAP10, TTC5, ANGEL2, SESN1, SH3BP5L, TROVE2, NDRG3, NAA50, HARS2, SPOP, DVL2, ZC3H15, ZMYM1, TAOK2, ZMYM4, RYBP, IREB2, ARMC1, DDX6, UPF3B, PPIC, HNRNPH…	1.34424	0.0298039	Cold_low_EM
GOTERM_CC_DIRECT	GO:0005730~nucleolus	27	0.000418558	RBM34, RBBP5, ZC3H15, RBL2, TAOK2, DFFB, RRP8, SENP5, PPP1CB, RPF1, CBX5, SETX, DDX6, TOP1, RBM4B, DDX47, UPF3B, ERCC6, REXO4, PRKRIP1, UBD, SETD7, THAP1, ARL4D, PARP2, ZCCHC7, RNF111	2.12649	0.0248059	Cold_low_EM
GOTERM_BP_DIRECT	GO:0006397~mRNA processing	11	0.000531856	SRSF1, RBM4B, DDX47, PPP4R2, METTL3, ZNF326, PTCD2, TARDBP, HNRNPA2B1, SMNDC1, RBM26	3.90875	0.421563	Cold_low_EM
GOTERM_BP_DIRECT	GO:0000398~mRNA splicing, via spliceosome	12	0.000775888	SRSF1, HNRNPH3, UPF3B, CRNKL1, METTL3, SRSF10, CLP1, CDC40, HNRNPA2B1, HNRNPH1, PDCD7, PPWD1	3.43817	0.329244	Cold_low_EM
GOTERM_BP_DIRECT	GO:0006396~RNA processing	8	0.000826811	ZFC3H1, TRNT1, HNRNPH3, CRNKL1, YTHDC2, HNRNPH1, RNGTT, SETX	5.24586	0.247018	Cold_low_EM
GOTERM_MF_DIRECT	GO:0005515~protein binding	165	0.00115944	METTL21A, PDLIM5, TTC9C, SNIP1, RPS6KB1, CLK1, SPRTN, TXLNA, PDHB, SMNDC1, CBX5, SETX, ATP2B1, GTF2E1, TOP1, CISD2, ASPA, ANKRD54, IFT20, TIA1, TARDBP, CLK4, FGFR1OP2, PMS2, LUC7L3, ATG9A, RBL2, HNRNPA2B1, FADD, RRP8, CSTF2T, TMEM25, PPP1CB, NDEL1, MED17, PRKRIP1, CNTROB, TESK2, PDE4DIP, NFE2L2, EIF2AK3, SLC40A1, ZNF436, RTP3, SRSF10, NAPG, PFKFB2, COPS7B, TTC5, SESN1, ZFC3H1, R3HCC1L, DDX47, NAA…	1.18306	0.0965279	Cold_low_EM
GOTERM_MF_DIRECT	GO:0003723~RNA binding	20	0.00118168	SRSF1, PUS3, CRNKL1, SRSF10, PUS10, HNRNPA2B1, IREB2, RLIM, NUFIP2, RPF1, TRNT1, IFIT2, TROVE2, HNRNPH3, MORC3, TARDBP, TIA1, NSUN3, HNRNPH1, RBM26	2.30306	0.0794337	Cold_low_EM
GOTERM_BP_DIRECT	GO:0006355~regulation of transcription, DNA-templated	40	0.00119986	ZFP62, ZBTB34, SRSF10, ZBTB6, ZBTB11, TAF1D, SNIP1, ZNF131, ANKRD30A, ZNF200, ZNF781, ZNF12, ZNF75A, RLIM, TSC22D1, GTF2E1, MAX, ZNF182, ZNF324, REXO4, PRMT5, ACTR5, TARDBP, TFB2M, THAP1, ZNF623, RBBP5, EMSY, ZNF282, ZNF644, ZNF189, ZFP3, RCAN1, ZNF668, PREB, TEFM, SETD7, APBB3, ZNF33B, ZNF436	1.69165	0.265708	Cold_low_EM
GOTERM_BP_DIRECT	GO:0008380~RNA splicing	10	0.00123699	RBM4B, DDX47, PPP4R2, HNRNPH3, ZNF326, TARDBP, CDC40, IVNS1ABP, PDCD7, LUC7L3	3.83169	0.224874	Cold_low_EM
GOTERM_MF_DIRECT	GO:0000166~nucleotide binding	15	0.00133663	SRSF1, RBM34, SRSF10, HNRNPA2B1, RCAN1, CSTF2T, ATP2B1, RBM4B, R3HCC1L, HNRNPH3, UPF3B, TARDBP, TIA1, HNRNPH1, RBM26	2.71503	0.0750564	Cold_low_EM
GOTERM_BP_DIRECT	GO:0006383~transcription from RNA polymerase III promoter	5	0.00168349	TROVE2, POLR3A, GTF3C2, IVNS1ABP, POLR3D	9.63728	0.250959	Cold_low_EM
GOTERM_BP_DIRECT	GO:0006376~mRNA splice site selection	4	0.00219528	SRSF1, SRSF10, LUC7L3, SETX	14.9661	0.27607	Cold_low_EM
GOTERM_CC_DIRECT	GO:0005681~spliceosomal complex	7	0.0026938	HNRNPH3, CRNKL1, ZNF326, CDC40, HNRNPA2B1, IVNS1ABP, SMNDC1	5.02632	0.121445	Cold_low_EM
GOTERM_CC_DIRECT	GO:0031463~Cul3-RING ubiquitin ligase complex	6	0.00309402	IPP, KLHL9, KBTBD7, KLHL21, KLHL20, SPOP	6.04444	0.116578	Cold_low_EM
GOTERM_BP_DIRECT	GO:0009411~response to UV	5	0.00412552	UBE2A, TROVE2, ERCC6, SPRTN, UBE2B	7.57215	0.41242	Cold_low_EM
GOTERM_MF_DIRECT	GO:0046872~metal ion binding	48	0.00653574	ZFP62, ZBTB34, CTDSPL, ZBTB6, ZBTB11, MOB3C, ZNF131, ZNF781, ZNF200, ZNF12, ZNF75A, SPRTN, ZFC3H1, ATP2B1, GTF2E1, TRIM2, TROVE2, CISD2, ASPA, ZNF182, ZNF324, ZNF326, PIKFYVE, OMA1, RBM26, STAMBP, ZNF281, ZNF623, ZC3H15, ZNF282, ZNF644, ZC3H10, ZNF280D, IREB2, PPP1R10, ZNF189, ZFP3, POLR3A, ZNF668, PPP1CB, ARMC1, HARBI1, ZBED5, RASSF1, TESK2, NLN, ZNF33B, ZNF436	1.46132	0.279536	Cold_low_EM
GOTERM_BP_DIRECT	GO:0034612~response to tumor necrosis factor	4	0.00677109	CASP8, UBD, RPS6KB1, YTHDC2	10.177	0.540122	Cold_low_EM
Category	Term	Count	PValue	Genes	Fold Enrichment	Benjamini	cluster
GOTERM_CC_DIRECT	GO:0005829~cytosol	83	8.1537e-07	NCBP1, CNOT8, GNPDA1, IDE, CLTC, OGDH, ITSN1, BAG5, HSPH1, TP53I3, FAM109A, UBXN2B, CASP7, BAG3, EEF2K, FRAT2, TUBG1, SEC24C, RHOF, HSP90AA1, CHAC2, SOCS2, PKN2, SKP2, HERC4, STK4, GCC1, PSMA1, ADO, NDEL1, ATG4A, RIPK1, TRIM32, NEK9, SERP1, USP8, EXOC8, RHPN2, FKBP4, MAPKAPK3, ASNSD1, AZIN1, RFFL, ATP6V1B2, RIC1, ZFP36L1, TPI1, THTPA, NUMA1, MTPN, GOLPH3L, WIPF2, GYS1, DNAJA1, ETNK1, PAFAH1B1, EI…	1.67753	0.000233984	Cold_low_EL
GOTERM_BP_DIRECT	GO:0006986~response to unfolded protein	8	4.83658e-06	HSPH1, HSP90AA1, HSPA4L, DNAJA1, DNAJB4, UBXN4, HSPA8, DNAJB5	11.5887	0.00620536	Cold_low_EL
GOTERM_MF_DIRECT	GO:0051087~chaperone binding	10	6.83599e-06	BAG5, BAG3, DNAJA1, STIP1, ATP1A1, AHSA2, DNAJB4, OGDH, BIRC2, DNAJB5	7.52373	0.00298969	Cold_low_EL
GOTERM_CC_DIRECT	GO:0005654~nucleoplasm	68	3.02336e-05	NCBP1, E2F3, THRB, IDE, VPS37A, INTS2, MED23, UBQLN1, CXADR, KDM1B, KLHL7, HSPH1, CASP7, CREB3L2, PARG, API5, ELMSAN1, ESCO1, KRR1, HSP90AA1, SECISBP2, PKN2, SKP2, MPP5, LIG4, ISG20L2, EYA3, PSMA1, FAM222B, EYA1, RFWD3, KDM2A, SMARCA5, BTAF1, USP8, SSH1, RHPN2, FKBP4, MAPKAPK3, RFFL, SOX9, COIL, ATF2, NUMA1, A1CF, STK40, HEXIM1, ETNK1, HSPA8, BRD1, UPF1, PDS5A, ZC3H18, PPHLN1, DTX2, CDC23, BIRC3,…	1.63649	0.00432919	Cold_low_EL
GOTERM_MF_DIRECT	GO:0005515~protein binding	177	4.82715e-05	NCBP1, ATP1B1, GNPDA1, CNOT8, THRB, IDE, LNX2, MED23, SLC22A11, INTS2, GUCD1, UBQLN1, ITSN1, SSR1, KLHL7, USP54, CASP8AP2, UBXN2B, TRAK1, TLK2, TUBG1, API5, KRR1, CEP85, SOCS2, CSNK1G1, ZNF646, FUT11, SECISBP2, SKP2, SOCS4, ISG20L2, LIG4, MRM1, BICD2, STK4, GCC1, PSMA1, NDEL1, KDM2A, TBRG1, ZNF239, PEX26, TRIM32, TMEM170A, SMARCA5, NEK9, CHORDC1, IL1R1, SSH1, CACUL1, MAPKAPK3, STIP1, ATP6V1B2, RF…	1.22786	0.010516	Cold_low_EL
GOTERM_MF_DIRECT	GO:0016874~ligase activity	15	0.000151069	LTN1, DTX2, HERC4, CBLL1, LIG4, RFFL, BIRC3, BIRC2, RNF125, RNF114, RFWD3, TRIM32, MEX3C, LIPT2, CHFR	3.38568	0.0218163	Cold_low_EL
GOTERM_CC_DIRECT	GO:0043234~protein complex	18	0.000155106	PARD6B, CCP110, HSP90AA1, FKBP4, PKN2, MPP5, ATP1A1, STIP1, CLTC, BIRC3, CXADR, UBQLN1, SOX9, BIRC2, STK4, RIC1, EYA1, EPS8L2	2.92718	0.0147301	Cold_low_EL
GOTERM_BP_DIRECT	GO:0006457~protein folding	12	0.000191246	BAG5, HSP90AA1, FKBP4, MLEC, PPID, BAG3, HSPA4L, DNAJA1, MOGS, DNAJB4, HSPA8, DNAJB5	4.05604	0.115806	Cold_low_EL
GOTERM_MF_DIRECT	GO:0008270~zinc ion binding	35	0.000774876	LTN1, THRB, ZNFX1, ZMAT3, IDE, LNX2, ERI2, CBLL1, RFFL, KDM1B, RNF125, ZDHHC23, TP53I3, PCGF3, RSPRY1, PEX2, SETMAR, SLC30A5, SEC24C, DCTD, BRD1, UPF1, DTX2, BIRC3, BIRC2, ZNF2, RNF114, RFWD3, KDM2A, TRIM32, FBXO30, MEX3C, CHFR, CHORDC1, PHF6	1.82462	0.0813792	Cold_low_EL
GOTERM_CC_DIRECT	GO:0005634~nucleus	106	0.000837672	NCBP1, CNOT8, THRB, IDE, KDM1B, KLHL7, TRMT1L, CASP8AP2, UBXN2B, TRAK1, CREB3L2, TLK2, API5, KRR1, CSNK1G1, ZNF646, SKP2, PISD, LIG4, STK4, ZNF2, OGFOD1, PSMA1, KDM2A, ZNF239, TRIM32, TBRG1, SMARCA5, NEK9, TSHZ1, MAPKAPK3, STIP1, SOX9, COIL, ATF2, TPI1, HEXIM1, MTPN, DNAJA1, SLC30A5, BHLHE40, PLAGL2, ZNF398, PARD6B, ZBTB41, FXR2, ZSCAN2, PPID, SALL1, TDG, HIVEP1, DNAJB5, PHF6, E2F3, ZNFX1, ALG2, …	1.31154	0.0583562	Cold_low_EL
GOTERM_MF_DIRECT	GO:0061630~ubiquitin protein ligase activity	11	0.00103905	RNF125, RNF114, LTN1, CACUL1, TRIM32, FBXO30, SKP2, UBE2W, RFFL, CBLL1, CHFR	3.58484	0.0870447	Cold_low_EL
GOTERM_BP_DIRECT	GO:1900034~regulation of cellular response to heat	7	0.00142914	BAG5, HSPH1, HSP90AA1, FKBP4, BAG3, CHORDC1, HSPA8	5.67845	0.45857	Cold_low_EL
GOTERM_CC_DIRECT	GO:0005737~cytoplasm	101	0.00189243	NCBP1, GNPDA1, IDE, UBQLN1, KLHL7, CASP8AP2, CPOX, TRAK1, TUBG1, API5, CEP85, KRR1, CSNK1G1, SOCS2, SKP2, SOCS4, LIG4, STK4, BICD2, GCC1, OGFOD1, PSMA1, TRIM32, NEK9, NEK4, EPS8L2, SSH1, NAGS, RHPN2, MAPKAPK3, RFFL, ATF2, HEXIM1, FGD4, PARD6B, FXR2, SRSF3, DNAJB9, EIF4E, PPID, SALL1, DNAJB4, E2F3, ALG2, VPS37A, CXADR, HSPH1, DCAF12, SMAP1, P4HA2, SLC23A2, BAG3, CASP7, EEF2K, PARG, FTSJ1, ABCE1, S…	1.29586	0.103026	Cold_low_EL
GOTERM_CC_DIRECT	GO:0043209~myelin sheath	9	0.00200343	GPI, ATP1B1, HSP90AA1, STIP1, ATP1A1, ATP6V1B2, DLAT, CLTC, HSPA8	3.96711	0.0914696	Cold_low_EL
GOTERM_MF_DIRECT	GO:0003723~RNA binding	19	0.00404203	KIAA0907, NCBP1, CNOT8, UPF1, ZMAT3, FXR2, MRM1, PURA, SRSF3, ADAT1, PSMA1, EYA1, TRMT1L, A1CF, JMJD6, ZNF239, TRIM32, MEX3C, PAPOLG	2.11682	0.255964	Cold_low_EL
GOTERM_CC_DIRECT	GO:0043231~intracellular membrane-bounded organelle	18	0.00427426	BTAF1, PPHLN1, RHPN2, TRA2A, VPS37A, ATP1A1, ATP6V1B2, CLTC, RNF125, UGT2B17, P4HA2, CASP7, CYP7A1, TBRG1, UGT2B4, PARG, HSPA13, UGT2B7	2.16129	0.161063	Cold_low_EL
GOTERM_BP_DIRECT	GO:0000132~establishment of mitotic spindle orientation	4	0.00464453	EYA1, NUMA1, NDEL1, PAFAH1B1	11.5887	0.776391	Cold_low_EL
GOTERM_MF_DIRECT	GO:0044822~poly(A) RNA binding	31	0.00593445	NCBP1, ZNFX1, ZMAT3, FKBP4, TRA2A, STIP1, CLTC, FAM46A, ZFP36L1, TRMT1L, TNPO1, API5, MEPCE, HSPA8, KRR1, UPF1, HSP90AA1, ZC3H18, PPHLN1, SECISBP2, PKN2, ISG20L2, FXR2, MRM1, PURA, SRSF3, EIF4E, PTCD1, MEX3C, RBM15, PHF6	1.67335	0.310944	Cold_low_EL
GOTERM_BP_DIRECT	GO:0016567~protein ubiquitination	14	0.00649612	WDTC1, SOCS2, DTX2, CCNF, SOCS4, CBLL1, BIRC3, CISH, KLHL7, DCAF12, RFWD3, TRIM32, FBXO30, FBXO33	2.37261	0.81317	Cold_low_EL
GOTERM_BP_DIRECT	GO:0035562~negative regulation of chromatin binding	3	0.00891674	BTAF1, TDG, MEPCE	20.2802	0.853572	Cold_low_EL
Category	Term	Count	PValue	Genes	Fold Enrichment	Benjamini	cluster
GOTERM_CC_DIRECT	GO:0005730~nucleolus	62	4.70681e-32	LYAR, RBM15B, TCOF1, WDR74, WDR75, RRP1B, RRN3, GRWD1, AEN, HMOX1, URB1, PUM3, DDX21, HIRIP3, SAP30L, TSEN2, TWISTNB, MDN1, FTSJ3, GNL3, NOL6, GTPBP4, EMG1, ZDHHC7, TP53, POLR1A, DIEXF, POLR1B, MRTO4, RSL1D1, NOP2, RCC2, MYBBP1A, TNFAIP1, PNMA1, UTP4, MIDN, NOC3L, BMS1, HNRNPM, DHX15, SPATA2, WDR12, USP36, NAT10, NSUN2, RBM28, NSUN5, NKRF, PDCD11, RRP12, TSR1, PAK1IP1, PNO1, ARID3A, HEATR1, NOP14…	6.30824	1.23318e-29	IBA_high
GOTERM_MF_DIRECT	GO:0044822~poly(A) RNA binding	68	3.66699e-30	ABCF1, LYAR, U2AF2, RBM15B, TCOF1, NAA15, EIF5B, PKM, FUBP1, WDR75, RRP1B, GRWD1, URB1, USP10, PUM3, DDX21, FTSJ3, GNL3, NOL6, GTPBP4, EMG1, RRP7A, G3BP1, DIEXF, CCT6A, YTHDF1, MRTO4, RSL1D1, UBE2O, NOP2, RCC2, EIF2S1, FARSA, MYBBP1A, ALDOA, UTP4, NOC3L, BMS1, HNRNPM, DDX49, DHX15, NAT10, USP36, NSUN2, RBM28, NSUN5, HNRNPAB, TES, GEMIN5, NKRF, PDCD11, TCP1, RRP12, TSR1, PNO1, HEATR1, RNPS1, PWP2,…	5.10928	1.24311e-27	IBA_high
GOTERM_BP_DIRECT	GO:0006364~rRNA processing	23	1.47884e-14	NOL6, UTP4, PDCD11, TSR1, EMG1, RRP7A, PNO1, NOB1, HEATR1, DIEXF, BMS1, PWP2, MRTO4, NOP14, WDR75, RRP1B, NOLC1, DDX49, NOP58, WDR12, DDX21, NOP56, MDN1	8.8468	1.46626e-11	IBA_high
GOTERM_CC_DIRECT	GO:0005654~nucleoplasm	77	3.29541e-14	ABCF1, RBM15B, U2AF2, CAD, FUBP1, WDR75, RRN3, AEN, WDR77, USP10, PUM3, DDX21, SAP30L, TWISTNB, TSEN2, GNL3, ANAPC1, NOL6, PDXK, EMG1, RRP7A, ZDHHC7, TP53, POLR1A, DIEXF, VEZT, POLR1B, TRMT61A, MRTO4, PPM1G, GTF2I, MYBBP1A, PTAFR, UTP4, NOB1, UGDH, MKNK1, BMS1, SLX4, HNRNPM, NUP214, DDX49, SQSTM1, WDR12, NAT10, NSUN2, GEMIN5, HNRNPAB, NKRF, PDCD11, EHMT1, TSR1, PAK1IP1, PNO1, ARPP19, ARID3A, TRIM…	2.41168	4.31954e-12	IBA_high
GOTERM_CC_DIRECT	GO:0005634~nucleus	108	3.60337e-11	CNOT9, MAEA, U2AF2, NAA15, EIF5B, SGMS1, WDR82, WDR74, CIPC, WDR77, HIRIP3, DDX21, SAP30L, SS18L1, GNL3, GTPBP4, PDXK, EMG1, EXD2, MRTO4, RCC2, EIF2S1, TELO2, MYBBP1A, ALDOA, NOC3L, NAT10, HNRNPAB, NKRF, PELI1, EHMT1, TSR1, SMG5, ARID3A, RNPS1, HEATR1, KCTD5, NOP14, HDAC4, RNF4, PLEKHA7, NOP16, PPRC1, BCL6B, DNMT1, PDCD6, ABCF2, E2F6, LYAR, TCOF1, CAD, PKM, FUBP1, RRN3, RRP1B, DYNLL1, GRWD1, AEN,…	1.73909	3.14695e-09	IBA_high
GOTERM_CC_DIRECT	GO:0032040~small-subunit processome	9	4.54662e-09	NOL6, NOP14, PDCD11, EMG1, NOP58, DIEXF, HEATR1, NOP56, PWP2	22.4219	2.97803e-07	IBA_high
GOTERM_CC_DIRECT	GO:0005829~cytosol	68	7.07855e-07	ABCF1, CNOT9, NARS, EIF5B, CAD, CKB, PKM, BAK1, GSR, CIPC, DYNLL1, RRP1B, HMOX1, WDR77, MLKL, NCKIPSD, ZW10, ANAPC1, PDXK, SGK3, G3BP1, TP53, CCT6A, UBE2O, RCC2, EIF2S1, TRAPPC4, FARSA, SRXN1, ALDOA, MIDN, GCLC, SRM, PHKA1, NOB1, UGDH, CTPS1, MKNK1, GCLM, TPM4, WDR45B, NUP214, MMACHC, SQSTM1, UCK2, DNAJA4, TRAF3, GEMIN5, PDCD11, TCP1, PELI1, TSR1, MAT2A, SMG5, TBC1D10A, PNO1, TRIM27, LMNA, RNPS1,…	1.78864	3.70909e-05	IBA_high
GOTERM_BP_DIRECT	GO:0000462~maturation of SSU-rRNA from tricistronic rRNA transcript (SSU-rRNA, 5.8S rRNA, LSU-rRNA)	7	2.02142e-06	NOP14, TSR1, EMG1, DIEXF, HEATR1, BMS1, PWP2	18.0061	0.00100313	IBA_high
GOTERM_MF_DIRECT	GO:0005515~protein binding	136	2.57892e-06	CNOT9, U2AF2, RBM15B, NAA15, EIF5B, WDR82, TOMM70, MMRN2, ANKRD52, WDR74, BAK1, CIPC, TAF5L, WDR77, YEATS2, PUM3, HIRIP3, MLKL, DDX21, SAP30L, SS18L1, GNL3, GTPBP4, EMG1, RRP7A, EXD2, MRTO4, NOP2, RCC2, EIF2S1, TELO2, TRAPPC4, MYBBP1A, TNFAIP1, PNMA1, ALDOA, SRM, ANKS4B, SLX4, HNRNPM, SLC48A1, NAT10, TRAF7, DNAJA4, TRAF3, HNRNPAB, NKRF, PELI1, EHMT1, SMG5, TBC1D10A, ARID3A, RNPS1, HEATR1, KCTD5, …	1.31323	0.000437033	IBA_high
GOTERM_MF_DIRECT	GO:0030515~snoRNA binding	6	3.68643e-06	NOP14, NOP58, DDX21, HEATR1, NOP56, PWP2	24.2369	0.000416481	IBA_high
GOTERM_MF_DIRECT	GO:0005524~ATP binding	38	1.01393e-05	ABCF1, PGS1, ABCF2, GCLC, NARS, ACTR3B, WRNIP1, MKNK1, CTPS1, CAD, BMS1, CKB, PKM, DDX49, DDX19A, DHX15, MLKL, DDX21, NAT10, UCK2, CDK16, MDN1, DNAJA4, TCP1, PDXK, MAT2A, SGK3, G3BP1, TP53, CCT6A, DDX58, UBE2O, ICK, DDX55, NOLC1, FARSA, IPPK, SRXN1	2.15619	0.000858943	IBA_high
GOTERM_CC_DIRECT	GO:0030687~preribosome, large subunit precursor	6	1.75379e-05	WDR74, RRP1B, WDR12, MDN1, FTSJ3, MRTO4	18.0406	0.000765535	IBA_high
GOTERM_CC_DIRECT	GO:0030688~preribosome, small subunit precursor	4	4.95907e-05	TSR1, RRP1B, NOB1, FTSJ3	49.8264	0.00185443	IBA_high
GOTERM_CC_DIRECT	GO:0030686~90S preribosome	4	0.000226016	RSL1D1, NOP14, HEATR1, BMS1	31.7077	0.00737551	IBA_high
GOTERM_CC_DIRECT	GO:0016020~membrane	43	0.000527088	ALDOA, ABCF1, CNOT9, ABCF2, CSF1, WRNIP1, NAA15, CTPS1, CAD, SGMS1, TOMM70, TPM4, HNRNPM, DYNLL1, DDX19A, HMOX1, NAT10, DDX21, ANO6, MDN1, DNAJA4, ZW10, GEMIN5, GNL3, ICAM1, GTPBP4, TRIM27, UNC5CL, HEATR1, RSL1D1, NOP14, PPM1G, LYVE1, DDX55, RCC2, GTF2I, EIF2S1, TELO2, NOP58, NOP56, FARSA, MYBBP1A, PTAFR	1.70429	0.015231	IBA_high
GOTERM_BP_DIRECT	GO:0000154~rRNA modification	3	0.000858743	NOP58, NAT10, NOP56	61.7353	0.247509	IBA_high
GOTERM_MF_DIRECT	GO:0004004~ATP-dependent RNA helicase activity	6	0.000985557	DDX55, DDX49, DDX19A, G3BP1, DHX15, DDX21	7.83038	0.064668	IBA_high
GOTERM_MF_DIRECT	GO:0034511~U3 snoRNA binding	3	0.00199054	TSR1, DIEXF, BMS1	42.4146	0.106472	IBA_high
GOTERM_BP_DIRECT	GO:0070475~rRNA base methylation	3	0.00495087	NOP2, EMG1, NSUN5	27.4379	0.708323	IBA_high
GOTERM_BP_DIRECT	GO:0000463~maturation of LSU-rRNA from tricistronic rRNA transcript (SSU-rRNA, 5.8S rRNA, LSU-rRNA)	3	0.00495087	GTPBP4, WDR12, FTSJ3	27.4379	0.708323	IBA_high
GOTERM_MF_DIRECT	GO:0003676~nucleic acid binding	22	0.00591159	ZNF276, NKRF, NARS, RBM15B, G3BP1, TRIM27, EXD2, RNPS1, DDX58, DDX55, DDX49, POGK, DDX19A, AEN, PPRC1, PSPC1, BCL6B, GPATCH4, TSEN2, ZSCAN29, RBM28, HNRNPAB	1.89466	0.249593	IBA_high
GOTERM_CC_DIRECT	GO:0016604~nuclear body	4	0.00621399	NACC2, TP53, SS18L1, GEMIN5	10.5692	0.150676	IBA_high
GOTERM_BP_DIRECT	GO:0045815~positive regulation of gene expression, epigenetic	5	0.00669647	POLR1A, DDX21, POLR1B, TWISTNB, MYBBP1A	6.6382	0.736682	IBA_high
GOTERM_BP_DIRECT	GO:0006361~transcription initiation from RNA polymerase I promoter	4	0.00727317	RRN3, POLR1A, POLR1B, TWISTNB	9.97742	0.701238	IBA_high
GOTERM_MF_DIRECT	GO:0001054~RNA polymerase I activity	3	0.00836173	POLR1A, POLR1B, TWISTNB	21.2073	0.2994	IBA_high
GOTERM_CC_DIRECT	GO:0005736~DNA-directed RNA polymerase I complex	3	0.00930871	POLR1A, POLR1B, TWISTNB	20.1222	0.199689	IBA_high
GOTERM_MF_DIRECT	GO:0003899~DNA-directed RNA polymerase activity	4	0.00991656	POLR1A, POLR1B, TWISTNB, POLR3E	8.92938	0.312977	IBA_high
Category	Term	%	PValue	Genes	Fold Enrichment	Benjamini	cluster
GOTERM_CC_DIRECT	GO:0043231~intracellular membrane-bounded organelle	19	1.18266e-05	ACOX2, CGRRF1, STX2, CYP51A1, DIAPH2, GPLD1, RORC, SIX5, ITM2B, MANBA, RAB11FIP5, CYP39A1, SQLE, HSD17B4, QSOX1, NSDHL, SLC25A17, BARD1, PPP5C	3.40951	0.00270464	IBA_low
GOTERM_BP_DIRECT	GO:0006695~cholesterol biosynthetic process	6	3.73339e-05	SQLE, CYP51A1, NPC1L1, MVK, NSDHL, DHCR24	15.5963	0.0343056	IBA_low
GOTERM_CC_DIRECT	GO:0070062~extracellular exosome	49	7.97254e-05	RTN4, BTD, RAB5B, TSPAN3, GPLD1, RAB1B, MTHFD1, SLC23A1, BHLHB9, ITIH1, TMEM59, KIFAP3, SND1, ITIH4, SERPINA3, SLC25A1, ITIH2, ITIH3, CDK5RAP2, ITFG1, MVB12B, STX2, QDPR, ACTN3, C8G, INHBC, F2, MVK, KALRN, GC, RBP5, TF, CAB39L, CD248, RRM2B, ITM2B, SEC14L3, PAFAH1B3, TMED10, APMAP, QSOX1, MYO1C, AKR1E2, ABHD14B, PCK2, PYGL, HEBP2, HDHD2, SERPIND1	1.74545	0.00908738	IBA_low
GOTERM_BP_DIRECT	GO:0055114~oxidation-reduction process	18	0.000101412	AKR1E2, HSD17B2, ADHFE1, CYP51A1, LDHD, QDPR, STAB2, RRM2B, MTHFD1, CYP39A1, SQLE, BCO1, DPYD, GFOD1, QSOX1, NSDHL, CRYZL1, DHCR24	3.00334	0.0463061	IBA_low
GOTERM_CC_DIRECT	GO:0005789~endoplasmic reticulum membrane	22	0.000135674	RTN4, SEC31B, HSD17B2, CYP51A1, ARMC10, RAB1B, MFSD2A, ATP11C, TRIQK, VTI1A, OS9, MIA2, CYP39A1, CNIH3, SQLE, MCFD2, TMED10, ORMDL3, TAPBPL, NSDHL, DHCR24, ALG14	2.55557	0.0103037	IBA_low
GOTERM_CC_DIRECT	GO:0072562~blood microparticle	9	0.00014069	GC, TF, BCHE, ITIH1, F2, ITIH4, SERPINA3, ITIH2, C8G	5.92886	0.00802273	IBA_low
GOTERM_BP_DIRECT	GO:0030212~hyaluronan metabolic process	4	0.000206094	ITIH1, ITIH4, ITIH2, ITIH3	32.9255	0.0622194	IBA_low
GOTERM_BP_DIRECT	GO:0006888~ER to Golgi vesicle-mediated transport	9	0.000217573	MIA2, COG5, F5, CNIH3, MCFD2, F2, TMED10, RAB1B, VTI1A	5.55618	0.0495914	IBA_low
GOTERM_BP_DIRECT	GO:0048208~COPII vesicle coating	6	0.000367239	F5, TRAPPC9, CNIH3, MCFD2, TMED10, RAB1B	9.71572	0.0663805	IBA_low
GOTERM_BP_DIRECT	GO:0030193~regulation of blood coagulation	4	0.000613861	STX2, F2, STAB2, SCARA5	23.2415	0.0912538	IBA_low
GOTERM_CC_DIRECT	GO:0005739~mitochondrion	27	0.000697837	ACOX2, ADHFE1, FARS2, DIAPH2, LDHD, PEX5, RAB1B, RRM2B, TMEM143, CLYBL, MTHFD1, MUT, SND1, HSD17B4, GHR, PDK1, NADK2, ARMC10, QDPR, PLGRKT, PCK2, ISCA2, HEBP2, MAPK9, AGXT2, FPGS, SLC25A17	2.03122	0.0314664	IBA_low
GOTERM_CC_DIRECT	GO:0012507~ER to Golgi transport vesicle membrane	5	0.00175708	SEC31B, CNIH3, MCFD2, TMED10, VTI1A	9.62806	0.0649179	IBA_low
GOTERM_CC_DIRECT	GO:0000139~Golgi membrane	15	0.00237343	RAB1B, ITM2B, WIPI1, VTI1A, RAB11FIP5, COG5, F5, TRAPPC9, CNIH3, TMEM59, MCFD2, TMED10, HS6ST1, TAPBPL, DHCR24	2.54142	0.0747925	IBA_low
GOTERM_MF_DIRECT	GO:0004867~serine-type endopeptidase inhibitor activity	6	0.00249014	ITIH1, ITIH4, SERPINA3, ITIH2, ITIH3, SERPIND1	6.36699	0.609354	IBA_low
GOTERM_MF_DIRECT	GO:0016491~oxidoreductase activity	8	0.00332133	ADHFE1, HSD17B2, AKR1E2, SQLE, HSD17B4, RRM2B, GFOD1, CRYZL1	4.11732	0.465868	IBA_low
GOTERM_MF_DIRECT	GO:0050660~flavin adenine dinucleotide binding	5	0.00339415	ACOX2, SQLE, LDHD, DPYD, DHCR24	8.04163	0.347704	IBA_low
GOTERM_CC_DIRECT	GO:0033116~endoplasmic reticulum-Golgi intermediate compartment membrane	5	0.00376083	F5, CNIH3, MCFD2, TMED10, RAB1B	7.8228	0.102244	IBA_low
GOTERM_CC_DIRECT	GO:0005777~peroxisome	6	0.00380816	ACOX2, TMEM135, PEX5, MVK, HSD17B4, SLC25A17	5.77684	0.0925178	IBA_low
GOTERM_BP_DIRECT	GO:0002576~platelet degranulation	6	0.00385396	TF, F5, ITIH4, SERPINA3, ITIH3, QSOX1	5.75397	0.402961	IBA_low
GOTERM_BP_DIRECT	GO:0006694~steroid biosynthetic process	4	0.0040089	HSD17B2, CYP51A1, PBX1, NSDHL	12.3471	0.374674	IBA_low
GOTERM_BP_DIRECT	GO:0010867~positive regulation of triglyceride biosynthetic process	3	0.00521745	LDLR, GPLD1, NR1H3	26.939	0.419261	IBA_low
GOTERM_CC_DIRECT	GO:0005759~mitochondrial matrix	10	0.00551798	PDK1, MUT, ISCA2, ADHFE1, BTD, FARS2, MTERF2, AGXT2, PCK2, FPGS	3.06214	0.119012	IBA_low
GOTERM_MF_DIRECT	GO:0004866~endopeptidase inhibitor activity	4	0.00672085	ITIH4, ITIH2, ITIH3, SERPIND1	10.2933	0.470371	IBA_low
GOTERM_BP_DIRECT	GO:0010951~negative regulation of endopeptidase activity	6	0.00757904	ITIH1, ITIH4, SERPINA3, ITIH2, ITIH3, SERPIND1	4.89801	0.509014	IBA_low
GOTERM_CC_DIRECT	GO:0005769~early endosome	8	0.00803519	TF, RAB11FIP5, RAB5B, LDLR, DIAPH2, RABGAP1L, KIAA0319, MVB12B	3.49806	0.154607	IBA_low
GOTERM_BP_DIRECT	GO:0006635~fatty acid beta-oxidation	4	0.0098039	ACOX2, PEX5, HSD17B4, SLC25A17	8.97968	0.567184	IBA_low
Category	Term	Count	PValue	Genes	Fold Enrichment	Benjamini	cluster
GOTERM_BP_DIRECT	GO:0006473~protein acetylation	3	0.000809389	ING4, KAT2B, NUPR1	68.2602	0.333469	SA_high
GOTERM_MF_DIRECT	GO:0004842~ubiquitin-protein transferase activity	7	0.00499177	WSB1, UBE3B, KLHL17, FBXO2, KLHL24, RNF19B, KLHL2	4.38012	0.696087	SA_high
GOTERM_BP_DIRECT	GO:0008652~cellular amino acid biosynthetic process	3	0.00692892	BCAT1, GOT1, GPT2	23.6285	0.824784	SA_high
GOTERM_BP_DIRECT	GO:2000194~regulation of female gonad development	2	0.00962447	NUPR1, INSR	204.78	0.801123	SA_high
Category	Term	Count	PValue	Genes	Fold Enrichment	Benjamini	cluster
GOTERM_CC_DIRECT	GO:0036064~ciliary basal body	4	0.000607627	DYNC2LI1, PTPN23, MARK4, RAB3IP	23.2449	0.0439816	SpD_low
Category	Term	Count	PValue	Genes	Fold Enrichment	Benjamini	cluster
GOTERM_CC_DIRECT	GO:0005654~nucleoplasm	18	0.000469063	UTP3, SSRP1, U2SURP, GSDMD, PRKAB1, RIOK2, PLAGL1, HNRNPK, SORBS1, ID2, RGS3, TRMT6, EED, SUPT16H, PSMD3, SNRNP40, GADD45A, LTV1	2.40464	0.0395457	SA_low
GOTERM_BP_DIRECT	GO:0006396~RNA processing	4	0.00236929	HNRNPK, U2SURP, CCNL1, SNRNP40	14.7331	0.51032	SA_low
Category	Term	Count	PValue	Genes	Fold Enrichment	Benjamini	cluster
GOTERM_CC_DIRECT	GO:0005739~mitochondrion	9	0.00538885	NUBPL, GCK, MARC2, SDHD, FDPS, RAI14, LYPLA1, ACAT2, BCO2	3.15968	0.322297	SpD_high
GOTERM_CC_DIRECT	GO:0042567~insulin-like growth factor ternary complex	2	0.00831528	IGFALS, IGF1	233.641	0.259627	SpD_high
GOTERM_BP_DIRECT	GO:0042997~negative regulation of Golgi to plasma membrane protein transport	2	0.00854874	LYPLA1, PKDCC	226.919	0.938596	SpD_high
Category	Term	Count	PValue	Genes	Fold Enrichment	Benjamini	cluster
GOTERM_BP_DIRECT	GO:0043488~regulation of mRNA stability	5	0.00277229	ZFP36L2, YWHAZ, PSMD10, KHSRP, APEX1	8.4911	0.833141	unassigned
GOTERM_BP_DIRECT	GO:0009967~positive regulation of signal transduction	4	0.00498014	ARHGAP1, SH2B3, GRB14, TOB1	11.4699	0.800134	unassigned

## Sheet: GeneEnrichment(GRO-seq)
Category	Term	Count	PValue	Genes	Fold Enrichment	Benjamini	Cluster
GOTERM_MF_DIRECT	GO:0044822~poly(A) RNA binding	164	3.59997e-40	TCERG1, DBR1, BCCIP, THUMPD1, NOC2L, SRP14, BZW1, GPATCH8, IPO5, UBE2L3, RRP9, EFTUD2, TIAL1, PPP1CC, EIF4ENIF1, ALKBH5, RPS16, PSMD4, KHSRP, ZNF326, MTERF1, MTPAP, PDIA3, NOM1, SCAF11, RPL22, ZCRB1, GTPBP4, SRRM1, EEF1A1, DYNC1LI1, DDX39A, EWSR1, SUB1, SBDS, SRSF3, TFAM, CCDC86, ERH, RPL26, SRSF5, SREK1, PPIG, EZR, RPL29, SRSF6, SRSF7, PPIA, SNRPB, DDX6, YTHDC1, DHX9, CSTF3, RPN1, UTP23, RTF1, H…	3.0806	2.97718e-37	Cold_high
GOTERM_CC_DIRECT	GO:0005654~nucleoplasm	242	6.02512e-27	GORAB, KEAP1, SMC5, ZDHHC7, THUMPD1, NOC2L, SMC4, RRP9, TIAL1, PSMD6, RPS16, PSMD7, PSMD4, KAT5, PSMD5, SAP130, DAG1, KAT8, KAT7, NFRKB, SCAF11, REV1, CSNK1D, HNF1A, MED4, SRRM1, HCFC1, DYNC1LI1, DDX39A, DDIT3, ATF5, ZNF830, CLOCK, ASF1A, NUP205, DHX9, CSTF3, COPS7B, WDR61, ATP5H, DPH3, DHX38, NUP88, ZBTB7B, RBM10, BARD1, TMEM192, RPS29, HNRNPF, HNRNPD, MPHOSPH10, HNRNPC, NOL11, CALM1, BAP1, LIN5…	1.95089	3.6211e-24	Cold_high
GOTERM_MF_DIRECT	GO:0005515~protein binding	546	1.4401e-22	MAPKBP1, CHIC2, SMC5, NOC2L, F11R, SMC4, RPL9, GPATCH8, PCMT1, NUB1, PSMD6, ZFYVE26, PSMD7, PSMD4, CAPNS1, PSMD5, LUC7L, MTERF1, NFRKB, VPS36, GABARAPL2, VPS18, RPL22, REV1, ARMC8, MED4, ATG13, GTPBP4, HCFC1, RUFY1, NISCH, DYNC1LI1, DDX39A, SCO1, EWSR1, BIN1, DDIT3, RPL26, NHLRC2, ATF5, CLOCK, PI4K2A, ASF1A, ZNF274, NUP205, RPN1, COPS7B, WDR61, ZNF24, GUCD1, RHOT1, ZBTB7B, VTI1B, NAA50, BARD1, AR…	1.31806	5.95481e-20	Cold_high
GOTERM_CC_DIRECT	GO:0005634~nucleus	359	2.02146e-19	TCERG1, CCNJ, GORAB, ZNF292, SMC5, ZDHHC7, NOC2L, SMC4, PWP1, RPL9, UBE2L3, IKZF5, RRP9, TIAL1, ALKBH5, NUB1, PSMD7, PSMD4, KAT5, PPP2R1A, FTH1, KAT8, ZNF844, KAT7, ACAD11, CCNL1, NFRKB, FBXO7, VPS36, TRIM23, ZFP1, SCAF11, RPL22, REV1, CSNK1D, HNF1A, MED4, GTPBP4, SRRM1, HCFC1, RUFY1, DDX39A, KARS, EWSR1, DDIT3, SUB1, CCDC86, VDAC2, TFAM, VDAC1, FAM76B, HECA, ATF5, ANKRA2, ZNF830, CLOCK, ASF1A, Z…	1.48793	6.0745e-17	Cold_high
GOTERM_MF_DIRECT	GO:0003723~RNA binding	77	9.38501e-18	DDX3X, RPL34, THUMPD1, SRP14, ELAVL1, RPL9, TIAL1, YY1, PTBP1, RPS16, KHSRP, PAPOLG, RBM5, EIF5A, NOM1, PCID2, RBM18, RPL22, THOC1, DDX54, ZCRB1, PTBP3, KIN, EWSR1, UNC50, SRSF3, TARS2, RPL26, SRSF5, HNRNPH3, RPL29, SRSF6, SNRPB, TRUB1, NUFIP2, SFSWAP, YTHDC1, CSTF3, IREB2, NOL9, MRM3, SCAF8, EXOSC5, RNASEH1, EXOSC9, ATXN1L, RBBP7, SMN1, RPL15, HNRNPA1, SRSF10, RAE1, BARD1, SMARCE1, SUZ12, NPM1, …	2.9853	2.58714e-15	Cold_high
GOTERM_BP_DIRECT	GO:0000398~mRNA splicing, via spliceosome	44	1.56532e-15	DBR1, DHX9, CSTF3, PRPF19, ELAVL1, EFTUD2, SART1, PTBP1, SART3, FIP1L1, PCF11, POLR2B, DHX35, TRA2B, TRA2A, DHX15, DHX38, SNRPB2, HNRNPA1, SRSF10, SF3B1, RBM5, SRSF11, SF3A1, CPSF7, HNRNPA3, BUD31, CPSF3, TFIP11, ZCRB1, SRRM1, LSM6, DDX39A, HNRNPF, HNRNPA2B1, HNRNPD, SRSF3, SRSF5, HNRNPC, HNRNPH3, SRSF6, SRSF7, RBM22, SNRPB	4.20751	3.90077e-12	Cold_high
GOTERM_CC_DIRECT	GO:0005739~mitochondrion	124	3.3348e-15	ISCA2, MTCH1, PANK2, RPL34, MPV17L, LACTB, PPP1CC, PPP2R1A, MPC1, ALKBH1, FTH1, MTERF1, PMPCA, MLYCD, MTPAP, FBXO7, PDK1, MCCC2, ATG13, SDHB, HCFC1, AFG3L2, POR, KARS, SCO1, TFAM, VDAC2, TARS2, VDAC1, PI4K2A, ABCG1, ISCU, GCDH, DDX6, AARS2, FECH, DIABLO, IREB2, ATP5H, ATP5O, FOXO1, ACAT1, PGS1, RHOT1, GRPEL1, RIPK1, NDUFV3, APOOL, IDH2, DNAJC11, RMDN3, TIMM44, VASN, COQ5, GNL3L, NDUFAF4, NMT1, DE…	2.09089	6.68071e-13	Cold_high
GOTERM_CC_DIRECT	GO:0005730~nucleolus	90	5.3693e-14	TCERG1, ZNF330, CCNT1, WDR3, GTF2B, RPL34, GORAB, HMGB2, ZDHHC7, NOC2L, TTF1, PWP1, RPL9, IPO5, RRP9, COIL, PTBP1, PPP1CC, NUB1, KAT5, DHX15, KAT7, RBM34, NEPRO, NOM1, SCAF11, NSUN2, DDX54, EDF1, TFIP11, ZBTB33, DDX52, UTP18, GTPBP4, EEF1A1, EWSR1, TRAF6, SUB1, MORF4L2, SBDS, CCDC86, SRSF5, EZR, DDX6, ZNF274, GTF3C3, RRN3, DDX24, STAU2, DHX9, UTP23, MRPS31, NOL9, RTF1, EXOSC5, EXOSC10, EXOSC9, SA…	2.35694	8.06737e-12	Cold_high
GOTERM_BP_DIRECT	GO:0008380~RNA splicing	34	1.4596e-12	TTF2, EFTUD2, PTBP1, SCAF8, PPP2R1A, KHSRP, DHX15, SAP18, ZNF326, RBM5, SRSF11, RBM10, IVNS1ABP, PRPF38B, SCAF11, THOC1, TFIP11, ZCRB1, QKI, PTBP3, SRRM1, SRPK1, SFPQ, LSM6, SON, MPHOSPH10, RP9, PPIG, SREK1, HNRNPC, HNRNPH3, TARDBP, SRSF7, SNRPB	4.34807	1.81866e-09	Cold_high
GOTERM_CC_DIRECT	GO:0005737~cytoplasm	319	2.4434e-11	PANK2, RPL34, GORAB, KEAP1, NOC2L, SMC4, RPL9, UBE2L3, TIAL1, LACTB, PCMT1, NUB1, PSMD4, FTH1, DAG1, KAT7, MLYCD, SEPHS1, FBXO7, GABARAPL2, RPL22, HNF1A, GTPBP4, HCFC1, RUFY1, DYNC1LI1, DDX39A, KARS, EWSR1, BIN1, DDIT3, TRIM13, TARS2, HECA, EZR, ATF5, ANKRA2, ZNF830, CLOCK, ZNF274, NUP205, DHX9, TWF1, COPS7B, WDR61, ATP5H, ACTR3B, NEU3, STRIP1, DHX35, DHX36, DPH3, DHX38, VTI1B, BARD1, NAA50, ARL1…	1.37101	2.93697e-09	Cold_high
GOTERM_MF_DIRECT	GO:0000166~nucleotide binding	48	6.84826e-11	RBM27, ELAVL1, TIAL1, PTBP1, SCAF8, SART3, EXOSC10, HNRNPDL, TRA2B, TRA2A, RBPMS2, SNRPB2, HNRNPA1, MTPAP, RBM34, SRSF10, RBM5, SRSF11, RBM10, HSP90AA1, CPSF7, HNRNPA3, CPSF6, NIFK, RBM18, ZCRB1, U2SURP, CHFR, PTBP3, SFPQ, ESRP2, EWSR1, HNRNPF, HNRNPA2B1, HNRNPD, RBM42, SRSF3, VDAC2, SREK1, SRSF5, HNRNPC, HNRNPH3, TARDBP, SRSF6, GRSF1, PPIL4, SRSF7, RBM22	2.92514	1.41588e-08	Cold_high
GOTERM_CC_DIRECT	GO:0005759~mitochondrial matrix	44	1.90027e-10	GCDH, ISCA2, ECHS1, FECH, NDUFA10, ATP5A1, DLST, ACSM5, PDHB, HSPD1, ACAT1, GRPEL1, ALDH2, ACADL, ATP5E, PMPCA, MTERF1, MLYCD, AASS, IDH3A, PDK1, BCKDHA, MCCC2, NDUFA9, PDHX, IDH3G, MDH2, MTERF2, BCKDHB, IDH2, TIMM44, SOD2, PDP2, KARS, SDHAF2, PCCA, PPIF, TFAM, TARS2, ACO2, ABCE1, DLD, ISCU, ATG4D	3.0199	1.90344e-08	Cold_high
GOTERM_BP_DIRECT	GO:0006396~RNA processing	23	5.67853e-10	SF3A1, SFSWAP, DHX9, CSTF3, THOC1, ZFC3H1, DDX54, TFIP11, U2SURP, MRM3, SART3, EXOSC10, HNRNPDL, HNRNPF, DHX35, EXOSC9, DHX36, HNRNPD, MPHOSPH10, HNRNPH3, GRSF1, CCNL1, RBM5	5.03364	4.71697e-07	Cold_high
GOTERM_BP_DIRECT	GO:0006406~mRNA export from nucleus	23	1.05569e-09	EIF5A, FYTTD1, NUP205, NUP133, NUP155, CPSF3, THOC1, SRRM1, ALKBH5, DDX39A, FIP1L1, NUP50, HNRNPA2B1, DHX38, SRSF3, NUP54, NUP88, SRSF5, SRSF6, RAE1, SRSF7, SRSF10, SRSF11	4.88263	6.04916e-07	Cold_high
GOTERM_BP_DIRECT	GO:0006397~mRNA processing	31	1.21372e-09	RBM27, TTF2, EFTUD2, PTBP1, ALKBH5, SCAF8, KHSRP, DHX15, SAP18, ZNF326, SMN1, HNRNPA1, SRSF11, RBM10, PRPF38B, SF3A1, CPSF6, SCAF11, TFIP11, QKI, PTBP3, SRRM1, SRPK1, KIN, SFPQ, SON, HNRNPA2B1, SREK1, SRSF5, TARDBP, SRSF7	3.6765	6.04916e-07	Cold_high
GOTERM_CC_DIRECT	GO:0005681~spliceosomal complex	21	4.4133e-09	IVNS1ABP, SF3A1, BUD31, PRCC, TFIP11, TTF2, EFTUD2, SCAF8, DDX39A, LSM6, HNRNPDL, HNRNPA2B1, SNRPB2, ZNF326, HNRNPC, HNRNPH3, SREK1, HNRNPA1, SF3B1, RBM5, SNRPB	5.01394	3.78913e-07	Cold_high
GOTERM_BP_DIRECT	GO:0043488~regulation of mRNA stability	22	1.07589e-08	PCID2, PSMD12, YTHDF2, PSMD13, ELAVL1, PSMA7, PSMD6, EXOSC5, PSMD7, PSMD4, PSMB2, PSMD5, PSMB3, PSMC1, EXOSC9, KHSRP, SERBP1, PSMB1, HNRNPD, TNPO1, DCP1A, HSPA1A	4.53431	4.46854e-06	Cold_high
GOTERM_CC_DIRECT	GO:0005829~cytosol	211	1.59605e-08	PANK2, RPL34, KEAP1, SMC4, RPL9, PCMT1, EFR3A, PSMD6, RPS16, PSMD7, PSMD4, CAPNS1, PSMD5, PPP2R1A, PPAT, FTH1, DAG1, FBXO7, VPS36, MCCC2, GABARAPL2, ATP6V1G1, RPL22, CSNK1D, ATG13, SRRM1, NISCH, KARS, DDIT3, TFAM, RPL26, RPL29, EZR, ANKRA2, PI4K2A, AARS2, STXBP3, DHX9, STXBP2, MYL12B, RHOT1, DHX36, DPH3, NUP88, VTI1B, LNPEP, UCK2, UCK1, RPS29, AGO4, HNRNPD, NMT1, FBXL3, HNRNPC, CALM1, DCP1A, ARF1…	1.42852	1.19903e-06	Cold_high
GOTERM_CC_DIRECT	GO:0016607~nuclear speck	30	2.22993e-08	FYTTD1, RBM27, DDX3X, YTHDC1, CTR9, PRPF19, EFTUD2, EIF4ENIF1, PPP1CC, ALKBH5, SART3, SAP18, CCNL1, SRSF10, SF3B1, CBX4, CSNK1A1, THOC1, TFIP11, SRRM1, SON, SRSF3, FAM76B, PPIG, SRSF5, TARDBP, ZNF830, SRSF6, CBLL1, LUC7L2	3.34975	1.48909e-06	Cold_high
GOTERM_CC_DIRECT	GO:0005743~mitochondrial inner membrane	48	2.79174e-08	MRS2, MTCH1, COX7B, FECH, TIMM9, COX4I1, MRPL19, NDUFA10, ATP5A1, MRPS31, NDUFB2, MRPS30, ATP5H, HIGD1A, ATP5O, ECSIT, HSPD1, ACAT1, PGS1, SLC25A29, SLC25A28, MPC1, MINOS1, TIMM17A, UQCRFS1, PMPCA, NDUFV3, ACAD11, TIMM29, MDH2, IDH2, DNAJC11, MRPS18A, TIMM44, COX6C, SOD2, SDHB, SLC25A38, SLC25A16, LETM1, HADHA, AFG3L2, SCO1, NDUFAF4, PPIF, VDAC2, VDAC1, SLC25A4	2.44281	1.67784e-06	Cold_high
GOTERM_BP_DIRECT	GO:0006369~termination of RNA polymerase II transcription	17	2.90444e-08	CPSF7, CSTF3, CPSF3, THOC1, SSU72, TTF2, SRRM1, DDX39A, FIP1L1, PCF11, DHX38, SRSF3, SRSF5, SRSF6, SRSF7, SRSF11, SNRPB	5.63891	1.03398e-05	Cold_high
GOTERM_CC_DIRECT	GO:0016020~membrane	151	3.99246e-08	MTCH1, CSE1L, BZW2, BZW1, RPL9, IPO5, ACTG1, EFTUD2, LAPTM4B, EIF4ENIF1, LAPTM4A, RPS16, PSMD7, CAPNS1, PPP2R1A, KHSRP, PAPOLG, CFL1, DAG1, CLCC1, APLP2, SLC30A4, TSC1, DNAJB14, ACSL3, MED4, GTPBP4, HCFC1, DPM1, EEF1A1, NISCH, DYNC1LI1, POR, DDX39A, BIN1, PPIF, ERH, HECA, VDAC1, RPL26, EZR, RPL29, ANKRA2, PPIA, PI4K2A, IGSF8, DDX6, PSMD12, NUP205, RETSAT, PSMD13, DHX9, RPN1, SLC1A4, RHOT1, NEU1, …	1.54043	2.18133e-06	Cold_high
GOTERM_BP_DIRECT	GO:0048025~negative regulation of mRNA splicing, via spliceosome	10	1.90355e-07	PTBP1, SFSWAP, TRA2B, HNRNPA2B1, RBM42, SAP18, SRSF6, SRSF7, SRSF10, RBM10	10.109	5.92954e-05	Cold_high
GOTERM_BP_DIRECT	GO:0031124~mRNA 3'-end processing	14	3.53186e-07	CPSF7, CSTF3, CPSF3, THOC1, SRRM1, DDX39A, FIP1L1, PCF11, DHX38, SRSF3, SRSF5, SRSF6, SRSF7, SRSF11	5.94407	9.77932e-05	Cold_high
GOTERM_BP_DIRECT	GO:0000209~protein polyubiquitination	27	5.16866e-07	PSMD12, TNKS, PSMD13, UBE2D3, PRPF19, UBE2J2, PSMA7, UBE2L3, PSMD6, ZNRF2, PSMD7, PSMD4, PSMB2, PSMD5, PSMB3, PSMB1, ARIH1, MYLIP, DTX3L, LNPEP, CHFR, RBX1, PSMC1, TRAF6, UBE2V2, RLIM, TPP2	3.1151	0.000128803	Cold_high
GOTERM_CC_DIRECT	GO:0071013~catalytic step 2 spliceosome	18	5.45074e-07	SF3A1, HNRNPA3, TFIP11, PRPF19, SRRM1, EFTUD2, SART1, HNRNPF, DHX35, HNRNPA2B1, DHX38, SNRPB2, HNRNPC, HNRNPA1, NRDE2, SF3B1, SNRPB, RBM22	4.39109	2.72991e-05	Cold_high
GOTERM_CC_DIRECT	GO:0043209~myelin sheath	23	1.0408e-06	PDIA3, HSP90AA1, MDH2, NDUFA10, GDI2, ATP5A1, DLST, SOD2, NDRG1, NAPG, HSPD1, ACTG1, ACTR1A, ATP6V1B2, VDAC2, UQCRFS1, VDAC1, ACO2, EZR, SLC25A4, DLD, CCT5, IDH3A	3.39603	4.8117e-05	Cold_high
GOTERM_BP_DIRECT	GO:0016032~viral process	35	1.82283e-06	NUP205, CCNT1, CALCOCO2, GTF2B, PSMA7, HSPD1, IPO5, KAT5, PSMB2, PSMB3, PSMB1, NUP88, TNPO1, HNRNPA1, RAE1, TRIM23, KDM4A, NPM1, NUP133, NUP155, SRPK1, RBX1, DDB1, DYNC1LI1, KIN, KARS, BIN1, NUP50, CCDC86, VDAC1, NUP54, ZMYND11, ABCE1, SLC25A4, RAN	2.48498	0.000412954	Cold_high
GOTERM_CC_DIRECT	GO:0070062~extracellular exosome	175	1.94049e-06	RPL34, CSE1L, UBE2D3, SRP14, F11R, ACTG1, UBE2L3, TIAL1, PCMT1, EFR3A, PSMD6, SLK, RPS16, PSMD7, CAPNS1, PPP2R1A, CFL2, FTH1, CFL1, DAG1, CEP250, CHP1, VPS36, TRIM23, PDIA3, ATP6V1G1, IAH1, IST1, APLP2, RPL22, EPDR1, PGD, SDHB, EEF1A1, SUB1, CMPK1, UBE2V2, VDAC2, KDELR2, VDAC1, RPL26, EZR, SRSF7, PPIA, SNRPB, IGSF8, PSMD12, STXBP3, PSMD13, GLO1, STXBP2, ARL1, SLC1A4, ATP5H, ATP5O, ACTR3B, NDRG1, …	1.39722	8.33023e-05	Cold_high
GOTERM_CC_DIRECT	GO:0019013~viral nucleocapsid	10	2.10729e-06	EFTUD2, HNRNPA3, HNRNPDL, HNRNPF, HNRNPD, SNRPB2, HNRNPH3, HNRNPC, HNRNPA1, SNRPB	8.01548	8.44319e-05	Cold_high
GOTERM_MF_DIRECT	GO:0003729~mRNA binding	20	5.99338e-06	FYTTD1, HSP90AA1, HNRNPA3, CPSF6, CLUH, CSTF3, ELAVL1, QKI, PURB, EIF4ENIF1, PCF11, ESRP2, TRA2B, RBPMS2, LUC7L, GRSF1, DCP1A, SF3B1, RBM5, LUC7L2	3.39317	0.000991304	Cold_high
GOTERM_BP_DIRECT	GO:0006364~rRNA processing	27	9.0164e-06	WDR3, RPL34, RPLP1, NOL9, RPL9, MRM3, RRP9, EXOSC5, RPS16, EXOSC10, EXOSC9, RPL15, DCAF13, RPL22, CSNK1D, RRP1B, DDX52, UTP18, RPS29, RPL37A, SBDS, MPHOSPH10, CCDC86, NOL11, RPL26, RPL29, MPHOSPH6	2.6784	0.00187241	Cold_high
GOTERM_BP_DIRECT	GO:0043161~proteasome-mediated ubiquitin-dependent protein catabolic process	26	1.05265e-05	PSMD12, PSMD13, UBE2D3, RNF6, FBXO45, PSMA7, PSMD6, PSMD7, RMND5A, PSMD4, KAT5, PSMB2, PSMD5, PSMB3, PSMB1, BUB3, CRBN, CSNK1A1, RBX1, DDB1, NSFL1C, PSMC1, DDIT3, TRIM13, RLIM, CLOCK	2.71896	0.00201785	Cold_high
GOTERM_CC_DIRECT	GO:0005643~nuclear pore	14	1.51718e-05	EIF5A, PCID2, NUP205, NUP133, NUP155, TNKS, SENP2, IPO5, XPO4, TMEM33, NUP50, NUP88, RAE1, RAN	4.36398	0.000569889	Cold_high
GOTERM_BP_DIRECT	GO:0061025~membrane fusion	11	2.90016e-05	NSFL1C, VAPA, STX16, SNAP23, ANXA7, CHP1, DNM1L, SNAP29, NAPG, STX10, VTI1B	5.30721	0.00516228	Cold_high
GOTERM_CC_DIRECT	GO:0031464~Cul4A-RING E3 ubiquitin ligase complex	6	3.60386e-05	DDB1, CRBN, GLMN, ARIH1, TRPC4AP, RBX1	13.466	0.00127407	Cold_high
GOTERM_BP_DIRECT	GO:0006099~tricarboxylic acid cycle	9	4.11541e-05	IDH3G, MDH2, IDH2, DLST, ACO2, PDHB, SDHB, DLD, IDH3A	6.58826	0.00683707	Cold_high
GOTERM_MF_DIRECT	GO:0003676~nucleic acid binding	75	4.3362e-05	DDX3X, ZNF292, TTF2, GPATCH8, TIAL1, YY1, PTBP1, SART3, ZNF844, RBM34, CMTR1, RBM5, ZNF322, KLF11, ZFP1, DDX54, TFIP11, DDX52, ZCRB1, DDB1, SFPQ, DDX39A, KARS, ESRP2, ZNF317, SRSF3, SRSF5, SREK1, HNRNPH3, ZNF830, CBLL1, SRSF7, ZNF672, DDX6, ZNF274, ZNF791, DDX24, DHX9, ZNF3, ZNF24, SCAF8, RNASEH1, HNRNPDL, TRA2B, DHX35, DHX36, TRA2A, ZNF746, DHX38, ZNF787, HNRNPA1, SRSF10, ZKSCAN1, RBM10, SRSF11,…	1.61477	0.00597673	Cold_high
GOTERM_CC_DIRECT	GO:0000502~proteasome complex	12	5.88892e-05	PSMD6, PSMD12, PSMD7, PSMB2, PSMD4, PSMD13, PSMB3, PSMD5, PSMC1, TXNL1, PSMB1, PSMA7	4.48867	0.00196625	Cold_high
GOTERM_BP_DIRECT	GO:0019083~viral transcription	17	6.85857e-05	NUP205, NUP133, NUP155, RPLP1, RPL34, RPL22, RPL9, RPS16, RPS29, NUP50, RPL37A, NUP54, NUP88, RPL26, RPL15, RPL29, RAE1	3.22223	0.0106822	Cold_high
GOTERM_BP_DIRECT	GO:0006521~regulation of cellular amino acid metabolic process	11	0.000110852	PSMD6, PSMD12, PSMD7, PSMB2, PSMD4, PSMD13, PSMB3, PSMD5, PSMC1, PSMB1, PSMA7	4.57877	0.0156982	Cold_high
GOTERM_BP_DIRECT	GO:0000375~RNA splicing, via transesterification reactions	8	0.00011339	DBR1, SCAF11, TRA2B, KHSRP, MPHOSPH10, SRSF10, SF3B1, SRRM1	6.79322	0.0156982	Cold_high
GOTERM_CC_DIRECT	GO:0030529~intracellular ribonucleoprotein complex	18	0.00011451	NPM1, HNRNPA3, CPSF6, CSNK1A1, DHX9, CPSF3, RPL22, EFTUD2, HNRNPDL, HNRNPF, HNRNPA2B1, HNRNPD, SNRPB2, HNRNPC, HNRNPH3, HNRNPA1, GAPDH, SNRPB	2.97044	0.00362212	Cold_high
GOTERM_BP_DIRECT	GO:0006511~ubiquitin-dependent protein catabolic process	22	0.000135109	USP47, USP38, PSMD13, USP33, USP22, UBE2D3, RNF6, TRPC4AP, PSMA7, CHFR, UBE2L3, RNF168, COPS3, NUB1, PSMD4, TP53INP2, RLIM, USP30, ARIH1, FBXO8, FBXO7, BAP1	2.56612	0.0177206	Cold_high
GOTERM_MF_DIRECT	GO:1990247~N6-methyladenosine-containing RNA binding	5	0.000152442	YTHDF2, YTHDF3, YTHDC1, HNRNPA2B1, HNRNPC	15.1481	0.01801	Cold_high
GOTERM_BP_DIRECT	GO:0006405~RNA export from nucleus	11	0.000214089	DDX39A, NUP155, THOC1, DHX38, SRSF3, SRSF5, HNRNPA1, SRSF6, SRSF7, SRSF11, SRRM1	4.24576	0.0266754	Cold_high
GOTERM_CC_DIRECT	GO:0031965~nuclear membrane	24	0.000237378	SUN2, CERS4, CERS5, GTF3C3, NUP205, NUP133, RETSAT, NUP155, TNKS, WDR3, MRPL19, RNF6, SLC30A1, SENP2, GTPBP4, IPO5, VAPA, TBC1D20, NUP50, FAM76B, NUP54, TNPO1, SEPHS1, GAPDH	2.35214	0.00713321	Cold_high
GOTERM_BP_DIRECT	GO:0006378~mRNA polyadenylation	8	0.000246875	CPSF6, PCF11, CSTF3, CPSF3, PAPOLG, SSU72, MTPAP, GRSF1	6.06538	0.0292958	Cold_high
GOTERM_BP_DIRECT	GO:0051436~negative regulation of ubiquitin-protein ligase activity involved in mitotic cell cycle	12	0.000450984	PSMD6, PSMD12, PSMD7, PSMB2, PSMD4, PSMD13, PSMB3, PSMD5, PSMC1, PSMB1, BUB3, PSMA7	3.58797	0.0510842	Cold_high
GOTERM_BP_DIRECT	GO:0006409~tRNA export from nucleus	8	0.000595582	NUP205, NUP133, NUP155, NUP50, NUP54, NUP88, RAE1, RAN	5.30721	0.0645301	Cold_high
GOTERM_BP_DIRECT	GO:0002479~antigen processing and presentation of exogenous peptide antigen via MHC class I, TAP-dependent	11	0.000666558	PSMD6, PSMD12, PSMD7, PSMB2, PSMD4, PSMD13, PSMB3, PSMD5, PSMC1, PSMB1, PSMA7	3.70662	0.0692109	Cold_high
GOTERM_CC_DIRECT	GO:0022624~proteasome accessory complex	6	0.000681913	PSMD6, PSMD12, PSMD4, PSMD13, PSMD5, PSMC1	7.92118	0.0195157	Cold_high
GOTERM_BP_DIRECT	GO:0051437~positive regulation of ubiquitin-protein ligase activity involved in regulation of mitotic cell cycle transition	12	0.000815212	PSMD6, PSMD12, PSMD7, PSMB2, PSMD4, PSMD13, PSMB3, PSMD5, PSMC1, PSMB1, BUB3, PSMA7	3.35192	0.0809626	Cold_high
GOTERM_MF_DIRECT	GO:0004004~ATP-dependent RNA helicase activity	11	0.000864828	DDX6, DDX39A, DDX3X, DDX24, DHX9, DHX35, DHX36, DHX15, DHX38, DDX54, DDX52	3.58893	0.0832651	Cold_high
GOTERM_BP_DIRECT	GO:0002181~cytoplasmic translation	7	0.000872992	RPLP1, RPL22, EIF3J, RPL26, RPL15, RPL29, RPL9	5.94407	0.0809626	Cold_high
GOTERM_BP_DIRECT	GO:0006376~mRNA splice site selection	6	0.000877203	YTHDC1, LUC7L, SRSF5, SRSF6, SRSF10, LUC7L2	7.49253	0.0809626	Cold_high
GOTERM_MF_DIRECT	GO:0004842~ubiquitin-protein transferase activity	30	0.00090615	KLHL36, KLHL15, UBE2D3, KEAP1, RNF6, PRPF19, UBE2L3, ZNRF2, RMND5A, ARIH1, FBXO7, TRIM23, BARD1, MYLIP, DTX3L, FEM1B, CHFR, RBX1, KLHL9, RNF168, RNF146, TRAF6, KLHL7, KBTBD2, TRIM13, RLIM, FBXL3, CBLL1, MPHOSPH8, RNF141	1.9338	0.0832651	Cold_high
GOTERM_BP_DIRECT	GO:0006221~pyrimidine nucleotide biosynthetic process	4	0.000965943	PRPS1, CMPK1, ERH, UMPS	16.9831	0.0832961	Cold_high
GOTERM_BP_DIRECT	GO:0038061~NIK/NF-kappaB signaling	11	0.000969337	PSMD6, PSMD12, PSMD7, PSMB2, PSMD4, PSMD13, PSMB3, PSMD5, PSMC1, PSMB1, PSMA7	3.53814	0.0832961	Cold_high
GOTERM_CC_DIRECT	GO:0005838~proteasome regulatory particle	5	0.000999487	PSMD6, PSMD12, PSMD7, PSMD13, PSMC1	10.2015	0.0273042	Cold_high
GOTERM_BP_DIRECT	GO:0046487~glyoxylate metabolic process	7	0.00109022	BCKDHA, PDHX, DAO, BCKDHB, DLST, PDHB, DLD	5.71545	0.0905607	Cold_high
GOTERM_BP_DIRECT	GO:0031145~anaphase-promoting complex-dependent catabolic process	12	0.00113227	PSMD6, PSMD12, PSMD7, PSMB2, PSMD4, PSMD13, PSMB3, PSMD5, PSMC1, PSMB1, BUB3, PSMA7	3.22463	0.0910201	Cold_high
GOTERM_BP_DIRECT	GO:0060071~Wnt signaling pathway, planar cell polarity pathway	13	0.00123387	PSMD12, PSMD13, FZD6, AP2A1, PSMA7, PSMD6, PSMD7, PSMD4, PSMB2, PSMD5, PSMB3, PSMC1, PSMB1	2.99973	0.0960878	Cold_high
GOTERM_MF_DIRECT	GO:0004596~peptide alpha-N-acetyltransferase activity	5	0.00123495	NAA50, NAA60, NAA20, NAA25, NAA15	9.63968	0.102131	Cold_high
GOTERM_BP_DIRECT	GO:0006606~protein import into nucleus	10	0.00144684	PDIA3, NUP133, NUP155, NUP50, CSE1L, CFL1, CRY2, NUP88, RAE1, RAN	3.66014	0.109258	Cold_high
GOTERM_BP_DIRECT	GO:0000387~spliceosomal snRNP assembly	7	0.00164651	SART1, SART3, TGS1, STRAP, SMN1, RBM22, SNRPB	5.30721	0.113313	Cold_high
GOTERM_CC_DIRECT	GO:0015030~Cajal body	9	0.00173109	COIL, EFTUD2, SART1, NPAT, LSG1, SART3, TGS1, ARIH1, SMN1	3.96059	0.0452341	Cold_high
GOTERM_BP_DIRECT	GO:0006351~transcription, DNA-templated	120	0.00173619	CCNT2, CCNT1, ZBTB24, KEAP1, UBP1, NOC2L, PWP1, BZW1, ETS2, IKZF5, UBE2L3, YY1, KAT5, KHSRP, SAP130, KAT8, ZNF844, ZNF326, KAT7, MTPAP, CCNL1, VPS36, ZNF322, ZFP1, ZBTB33, EEF1A1, HIC2, DMTF1, EWSR1, DDIT3, MORF4L2, ZNF317, CLOCK, ASF1A, ZNF672, ZNF274, ZNF791, CTR9, WDR61, ZNF24, RLF, FOXO1, NPAT, HNRNPDL, DHX36, SMYD2, ZNF787, ZKSCAN1, AKIRIN2, POU2F1, CBX4, PHF10, DENND4A, CBX3, MTERF2, ZBTB10…	1.30305	0.113313	Cold_high
GOTERM_BP_DIRECT	GO:0000381~regulation of alternative mRNA splicing, via spliceosome	8	0.00174759	PTBP1, SF3A1, TRA2B, SAP18, SREK1, SRSF6, RBM10, RBM5	4.46923	0.113313	Cold_high
GOTERM_BP_DIRECT	GO:0090090~negative regulation of canonical Wnt signaling pathway	18	0.00176385	PSMD12, CSNK1A1, PSMD13, FZD6, FOXO1, PSMA7, RBX1, MAD2L2, PSMD6, PSMD7, SDHAF2, PSMD4, PSMB2, PSMD5, PSMB3, PSMC1, DDIT3, PSMB1	2.34429	0.113313	Cold_high
GOTERM_BP_DIRECT	GO:0010510~regulation of acetyl-CoA biosynthetic process from pyruvate	5	0.00177697	PDHX, PDP2, PDHB, DLD, PDK1	8.84534	0.113313	Cold_high
GOTERM_BP_DIRECT	GO:0048024~regulation of mRNA splicing, via spliceosome	5	0.00177697	SON, YTHDC1, SRSF3, SRSF10, SRPK1	8.84534	0.113313	Cold_high
GOTERM_BP_DIRECT	GO:0061732~mitochondrial acetyl-CoA biosynthetic process from pyruvate	4	0.00186429	PDHX, MPC1, PDHB, DLD	14.1525	0.113313	Cold_high
GOTERM_BP_DIRECT	GO:0017196~N-terminal peptidyl-methionine acetylation	4	0.00186429	NAA60, NAA20, NAA25, NAA15	14.1525	0.113313	Cold_high
GOTERM_MF_DIRECT	GO:0050733~RS domain binding	4	0.00186985	SON, LUC7L, SRSF5, SRSF10	14.1382	0.140579	Cold_high
GOTERM_CC_DIRECT	GO:0005753~mitochondrial proton-transporting ATP synthase complex	6	0.001934	ATP5E, ATP5A1, PPIF, USMG5, ATP5H, ATP5O	6.41239	0.0484306	Cold_high
GOTERM_BP_DIRECT	GO:0098609~cell-cell adhesion	25	0.00227983	RAB1A, DDX6, DDX3X, RPL34, TWF1, F11R, BZW2, BZW1, NDRG1, CNN3, PCMT1, SLK, PERP, RPL15, YKT6, IST1, CSNK1D, VASN, HCFC1, VAPA, SERBP1, MAPRE1, RPL29, RAN, HSPA1A	1.95838	0.13527	Cold_high
GOTERM_MF_DIRECT	GO:0098641~cadherin binding involved in cell-cell adhesion	26	0.00266183	ITGB1, RAB1A, DDX6, DDX3X, RPL34, TWF1, F11R, BZW2, BZW1, NDRG1, CNN3, PCMT1, SLK, RPL15, YKT6, IST1, CSNK1D, VASN, HCFC1, VAPA, SERBP1, EZR, MAPRE1, RPL29, RAN, HSPA1A	1.90134	0.183444	Cold_high
GOTERM_CC_DIRECT	GO:0005913~cell-cell adherens junction	27	0.00267718	ITGB1, RAB1A, DDX6, DDX3X, RPL34, TWF1, F11R, BZW2, BZW1, NDRG1, CNN3, PCMT1, SLK, DAG1, RPL15, YKT6, IST1, CSNK1D, VASN, HCFC1, VAPA, SERBP1, EZR, MAPRE1, RPL29, RAN, HSPA1A	1.87607	0.0643595	Cold_high
GOTERM_BP_DIRECT	GO:0006091~generation of precursor metabolites and energy	9	0.00313759	SCO1, FECH, COX4I1, PHKG2, DLST, ACO2, COX6C, SLC25A4, AASS	3.60489	0.181834	Cold_high
GOTERM_BP_DIRECT	GO:0000380~alternative mRNA splicing, via spliceosome	5	0.00333286	PTBP1, SFPQ, SFSWAP, ESRP2, SRSF6	7.58172	0.188471	Cold_high
GOTERM_BP_DIRECT	GO:0016925~protein sumoylation	14	0.00340336	NUP205, NUP133, CBX4, NUP155, SMC5, SENP2, RNF168, NUP50, SP3, UBA2, NUP54, NUP88, HNRNPC, RAE1	2.5402	0.188471	Cold_high
GOTERM_CC_DIRECT	GO:0042645~mitochondrial nucleoid	8	0.00348906	HADHA, MTERF2, VDAC2, TFAM, VDAC1, MTERF1, SOD2, GRSF1	3.98993	0.0806511	Cold_high
GOTERM_MF_DIRECT	GO:0019003~GDP binding	9	0.0035571	RAP2C, RAB21, DYNC1LI1, PRPS1, ARF1, RAB5A, RAB22A, RAN, TRIM23	3.53455	0.226287	Cold_high
GOTERM_BP_DIRECT	GO:0000715~nucleotide-excision repair, DNA damage recognition	6	0.00377353	DDB1, COPS3, COPS2, COPS7B, COPS8, RBX1	5.53795	0.204427	Cold_high
GOTERM_BP_DIRECT	GO:0010827~regulation of glucose transport	7	0.00396397	NUP205, NUP133, NUP155, NUP50, NUP54, NUP88, RAE1	4.50308	0.210175	Cold_high
GOTERM_BP_DIRECT	GO:0010501~RNA secondary structure unwinding	8	0.00415774	DDX6, DDX39A, DDX3X, DDX24, AGO4, DHX36, DDX54, DDX52	3.85979	0.215435	Cold_high
GOTERM_MF_DIRECT	GO:0004843~thiol-dependent ubiquitin-specific protease activity	11	0.00422808	USP47, VCPIP1, USP38, USP33, USP22, EIF3F, USP30, OTUD1, TANK, ANKZF1, BAP1	2.916	0.249759	Cold_high
GOTERM_BP_DIRECT	GO:0090263~positive regulation of canonical Wnt signaling pathway	14	0.00423608	PSMD12, TNKS, PSMD13, CSNK1D, PSMA7, RNF146, PSMD6, PSMD7, PSMD4, PSMB2, PSMD5, PSMB3, PSMC1, PSMB1	2.4767	0.215435	Cold_high
GOTERM_CC_DIRECT	GO:0000178~exosome (RNase complex)	5	0.00461422	EXOSC5, EXOSC10, EXOSC9, KHSRP, MPHOSPH6	7.01355	0.0990409	Cold_high
GOTERM_CC_DIRECT	GO:0035098~ESC/E(Z) complex	5	0.00461422	SUZ12, HDAC2, RBBP4, MTF2, RBBP7	7.01355	0.0990409	Cold_high
GOTERM_BP_DIRECT	GO:0050821~protein stabilization	15	0.00485635	HSP90AA1, USP33, TSC1, NAPG, GTPBP4, HSPD1, SAV1, HCFC1, TBRG1, CHP1, NAA15, GAPDH, CCT5, HSPA1A, CCT4	2.34141	0.242035	Cold_high
GOTERM_BP_DIRECT	GO:0006457~protein folding	18	0.00495337	PDIA3, RIC3, HSP90AA1, VBP1, TXNL1, TTC1, PDRG1, TMX3, GRPEL1, DNAJA2, PPIF, FKBP9, PPIG, PPIL4, PPIA, CCT5, CCT4, TXNDC5	2.12288	0.242035	Cold_high
GOTERM_CC_DIRECT	GO:0042470~melanosome	12	0.00525597	ITGB1, PDIA3, RAB1A, HSP90AA1, TMEM33, RPN1, SLC2A1, ATP6V1B2, SLC1A4, RAB5A, RAN, CCT4	2.66654	0.108925	Cold_high
GOTERM_MF_DIRECT	GO:0051082~unfolded protein binding	13	0.00560349	NPM1, HSP90AA1, TTC1, HSPD1, PDRG1, AFG3L2, GRPEL1, DNAJA2, PPIA, SRSF10, CCT5, HSPA1A, CCT4	2.50632	0.308939	Cold_high
GOTERM_CC_DIRECT	GO:0071004~U2-type prespliceosome	5	0.00582416	SF3A1, LUC7L, SF3B1, LUC7L2, SNRPB	6.60099	0.112913	Cold_high
GOTERM_CC_DIRECT	GO:0005852~eukaryotic translation initiation factor 3 complex	5	0.00582416	EIF3M, DDX3X, EIF3J, EIF3F, ABCE1	6.60099	0.112913	Cold_high
GOTERM_CC_DIRECT	GO:0043231~intracellular membrane-bounded organelle	39	0.0063457	DDX6, CALCOCO1, CALCOCO2, STX16, MPV17L, ZDHHC7, RNF6, ABHD5, IPO5, TBRG1, NEU3, EIF4ENIF1, TRA2A, NEU1, ZNF326, CLCC1, DNM1L, MTPAP, AASS, VTI1B, BARD1, RIC3, POU2F1, VBP1, TMEM192, PEX1, PPHLN1, PEX14, RUFY1, DPM1, KIN, POR, ATP6V1B2, DCP1A, LSM14A, GAPDH, CLOCK, ABCG1, ITM2B	1.56862	0.11918	Cold_high
GOTERM_CC_DIRECT	GO:0005777~peroxisome	12	0.00654539	HSDL2, TMEM135, DAO, MPV17L, IDH2, PEX1, ACOX3, MLYCD, ACAD11, MFF, DNM1L, PEX14	2.58962	0.119206	Cold_high
GOTERM_BP_DIRECT	GO:0000245~spliceosomal complex assembly	6	0.00656574	SART3, SCAF11, SMN1, PRPF19, SF3B1, RBM5	4.89896	0.313294	Cold_high
GOTERM_BP_DIRECT	GO:0010467~gene expression	8	0.00679436	PTBP1, HNRNPA3, POLR2B, HNRNPF, HNRNPA2B1, HNRNPD, HNRNPC, HNRNPA1	3.53814	0.313294	Cold_high
GOTERM_BP_DIRECT	GO:0015031~protein transport	31	0.00692158	PLEKHF2, GPR89A, ARF1, TNKS, TIMM9, VPS4B, SNAP23, STXBP2, GDI2, RAB22A, RAB21, EIF4ENIF1, TBC1D17, YKT6, CCDC93, SNAP29, TSNAX, GABARAPL2, COG6, IST1, SENP2, RAB11A, RUFY1, LSG1, NASP, UNC50, PLEKHM1, KDELR2, RAB5A, SFT2D1, ATG4D	1.66606	0.313294	Cold_high
GOTERM_BP_DIRECT	GO:0010388~cullin deneddylation	4	0.00704031	COPS3, COPS2, COPS7B, COPS8	9.43503	0.313294	Cold_high
GOTERM_BP_DIRECT	GO:0006353~DNA-templated transcription, termination	4	0.00704031	MTERF1, TTF2, SMN1, TTF1	9.43503	0.313294	Cold_high
GOTERM_MF_DIRECT	GO:0036002~pre-mRNA binding	4	0.00706052	PTBP1, TRA2B, SRSF6, RBM22	9.42546	0.36494	Cold_high
GOTERM_BP_DIRECT	GO:0045892~negative regulation of transcription, DNA-templated	37	0.00744923	CREBZF, KDM5C, HDAC2, THRA, CEBPD, GMNN, HMGB2, UBP1, ZNF24, FOXO1, KAT5, BAHD1, ZNF746, KAT8, YAF2, SMARCE1, KLF11, KDM4A, USP47, POU2F1, CBX4, CBX3, ZBTB33, PEX14, HIC2, SFPQ, TRAF6, COPS2, DDIT3, CRY2, SP3, PDCD4, RLIM, ATF5, MPHOSPH8, CLOCK, GZF1	1.57408	0.325675	Cold_high
GOTERM_BP_DIRECT	GO:0042752~regulation of circadian rhythm	8	0.00761295	MAPK9, PPP1CC, SFPQ, MAPK8, CRY2, HNRNPD, FBXL3, CSNK1D	3.46593	0.326038	Cold_high
GOTERM_BP_DIRECT	GO:0006283~transcription-coupled nucleotide-excision repair	10	0.0077192	DDB1, COPS3, POLR2B, COPS2, COPS7B, ZNF830, GTF2H3, COPS8, PRPF19, RBX1	2.86876	0.326038	Cold_high
GOTERM_BP_DIRECT	GO:1900034~regulation of cellular response to heat	10	0.00841637	HSP90AA1, NUP205, NUP133, NUP155, NUP50, CHORDC1, NUP54, NUP88, RAE1, HSPA1A	2.83051	0.34956	Cold_high
GOTERM_BP_DIRECT	GO:0006412~translation	22	0.00858057	RPLP1, RPL34, RPL22, MRPL19, MRPS18A, MRPS30, GTF2H3, RPL9, SLC25A38, SLC25A16, EFTUD2, SEPSECS, SLC25A29, SLC25A28, RPS16, RPS29, RPL37A, EIF4EBP2, RPL26, RPL15, RPL29, SLC25A4	1.84598	0.350537	Cold_high
GOTERM_CC_DIRECT	GO:0000151~ubiquitin ligase complex	12	0.0086356	BARD1, RNF168, DCUN1D4, FBXL3, ARIH1, UBE2J2, FBXO8, CBLL1, FBXO7, MPHOSPH8, UBE2L3, HSPA1A	2.49371	0.14988	Cold_high
GOTERM_MF_DIRECT	GO:0032403~protein complex binding	19	0.00872619	NDUFA9, ITGB1, IGBP1, THRA, IST1, CRIPT, TWF1, AP2A1, PEX1, RBX1, HADHA, PPP1CC, NASP, CASP3, DAG1, UQCRFS1, RIPK1, VDAC1, RBM10	1.95601	0.42137	Cold_high
GOTERM_CC_DIRECT	GO:0031201~SNARE complex	8	0.00872844	STX16, SNAP23, STXBP2, YKT6, SNAP29, NAPG, STX10, VTI1B	3.38768	0.14988	Cold_high
GOTERM_MF_DIRECT	GO:0031625~ubiquitin protein ligase binding	24	0.00917128	GABARAPL2, KDM4A, FZD6, GLMN, DERL1, FZD8, UBE2Z, UBE2J2, TANK, FOXO1, HSPD1, UBE2L3, ACTG1, RBX1, TRAF6, UBE2V2, ZNF746, RIPK1, ARIH1, ANKRA2, DNM1L, FBXO7, MPHOSPH8, HSPA1A	1.77343	0.42137	Cold_high
GOTERM_CC_DIRECT	GO:0005925~focal adhesion	29	0.00927577	ITGB1, ARF1, STX16, RPLP1, USP33, SNAP23, GDI2, PRUNE1, TWF1, RPL9, ACTG1, CNN3, CORO1C, RAB21, PPP1CC, RPS16, CFL1, DAG1, CHP1, PDIA3, ACTR2, NPM1, RPL22, RPS29, RPL37A, EZR, LAMTOR3, PPIA, HSPA1A	1.6646	0.15268	Cold_high
GOTERM_BP_DIRECT	GO:0075733~intracellular transport of virus	8	0.00946533	NUP205, NUP133, NUP155, NUP50, NUP54, NUP88, RAE1, RAN	3.33001	0.380445	Cold_high
GOTERM_CC_DIRECT	GO:0031463~Cul3-RING ubiquitin ligase complex	9	0.00952701	KLHL9, KLHL36, KLHL15, KLHL7, GLMN, KBTBD2, KEAP1, ARIH1, RBX1	3.01478	0.15268	Cold_high
GOTERM_CC_DIRECT	GO:0005778~peroxisomal membrane	8	0.00965366	ARF1, DAO, MPV17L, PXMP2, TTC1, ACSL3, PEX1, PEX14	3.32494	0.15268	Cold_high
Category	Term	Count	PValue	Genes	Fold Enrichment	Benjamini	Cluster
GOTERM_BP_DIRECT	GO:0055114~oxidation-reduction process	47	1.30162e-07	DMGDH, STEAP3, MTRR, MAOB, GLDC, FAXDC2, HHIP, MGST1, CPOX, MSMO1, HMGCR, CYP2C18, CYP7A1, CRYZ, FADS2, SDR16C5, AKR7A2, SPR, SH3PXD2A, HSD17B2, PNPO, SC5D, BCO1, CBR4, FADS1, AOC3, VCAM1, HGD, AKR1C1, AKR1A1, PIPOX, CYP7B1, PTGR1, KMO, CYP8B1, PDIA5, DUS2, QDPR, CYP39A1, CYP2A7, CYP2C9, SCCPDH, P4HA1, BDH1, MSRB2, HHIPL1, IDO2	2.34709	0.000343759	Cold_low
GOTERM_CC_DIRECT	GO:0005829~cytosol	154	9.69705e-07	CDA, MTRR, UBXN2B, GLDC, FAM13A, INPPL1, PEBP1, PARK7, ARHGAP35, AKR7A2, BAIAP2L1, GRB14, ANKFY1, TRIM25, PDE8B, GLUL, GAMT, USP8, ATG3, WSB1, MAP2K2, HGD, TPM1, AIP, AP1AR, CMBL, MAT1A, FNDC3A, KMO, UPB1, RNF40, RNF41, DCTD, RBP4, PPP1R3C, TXNIP, IDO2, PDE9A, SKAP2, SAR1B, NEDD4L, PLA2G6, ZFP36L2, ZFP36L1, ACMSD, DGUOK, RAP1A, TKFC, LARS, RAD21, VTI1A, PNPO, LTA4H, PCK1, MORC2, SPTBN1, STAT5B, C…	1.4398	0.000221049	Cold_low
GOTERM_CC_DIRECT	GO:0005789~endoplasmic reticulum membrane	56	1.0653e-06	POMT2, MCFD2, PIGN, KDELR1, PIGP, CISD2, ATP2A2, MSMO1, PIGV, FADS2, SDR16C5, SERP1, EVA1A, ERMARD, CREB3L2, FADS1, SMIM14, RNF43, ALG8, PCYT1A, G6PC, ALG2, TMC6, CYP7B1, PDIA5, CYP39A1, CYP2A7, DAD1, UGT2B4, PREB, PIGL, SLC27A4, RTN3, MYRF, SAR1B, UNC93B1, FAXDC2, ATP10D, MGST1, TMTC2, HMGCR, AGPAT1, CYP2C18, CYP7A1, EXTL1, HSD17B2, VTI1A, SC5D, CD59, CEPT1, XBP1, SEC24A, CYP8B1, CYP2C9, GJB1, V…	2.01348	0.000221049	Cold_low
GOTERM_BP_DIRECT	GO:0002526~acute inflammatory response	7	2.02329e-06	ACVR1, VCAM1, B4GALT1, VNN1, TNFSF4, EIF2AK1, NUPR1	15.9187	0.00267175	Cold_low
GOTERM_CC_DIRECT	GO:0070062~extracellular exosome	127	4.92195e-05	TFRC, PEBP1, PARK7, LIPA, SLC4A4, AKR7A2, BAIAP2L1, APMAP, SCP2, FAM162A, C1RL, ANKFY1, GLUL, GAMT, ST6GAL1, HGD, ENTPD5, CMBL, KMO, UPB1, DCTD, MINPP1, RBP4, RBP5, CLDN3, SELENOP, SCNN1A, PLPP3, CES2, CFD, RTN3, NDRG3, MAOB, CFI, LTBP4, NEDD4L, LIN7A, KNG1, ACMSD, C3, C5, RAP1A, APOM, TKFC, APOH, ZNHIT6, PNPO, LTA4H, PCK1, SPTBN1, TOR1A, VCAM1, GOT1, GFPT1, FN1, GNG12, LY75-CD302, IFT20, QDPR, V…	1.40026	0.0068087	Cold_low
GOTERM_BP_DIRECT	GO:0006805~xenobiotic metabolic process	12	5.90736e-05	AOC3, CYP2C9, AKR7A2, HNF4A, AKR1C1, NR1I2, MGST1, AIP, UGT2B4, CMBL, CYP2C18, CES2	4.54821	0.0520045	Cold_low
GOTERM_CC_DIRECT	GO:0005769~early endosome	20	0.000164283	ARRDC4, AOC3, USP8, RUBCN, MAP2K2, VCAM1, TGFBRAP1, ARRDC3, APOC3, AP1AR, TM9SF4, TRAK2, RAP1A, SNX17, RASGEF1B, ANGPTL3, KDR, ANKFY1, VIPAS39, RAB17	2.70683	0.0170444	Cold_low
GOTERM_BP_DIRECT	GO:0042632~cholesterol homeostasis	10	0.000281545	ABCG5, XBP1, APOM, G6PC, NR5A2, AKR1C1, ANGPTL3, APOC3, TMEM97, CYP7A1	4.61928	0.183405	Cold_low
GOTERM_BP_DIRECT	GO:0006888~ER to Golgi vesicle-mediated transport	16	0.000347227	DYNC1I2, MCFD2, SEC24A, KDELR1, SAR1B, COG4, PROC, VAPB, GORASP1, CREB3L2, VTI1A, PREB, CD59, MPPE1, CTSC, SPTBN1	2.95634	0.183405	Cold_low
GOTERM_MF_DIRECT	GO:0042803~protein homodimerization activity	44	0.000378502	CDA, CEBPA, MYOM1, B4GALT1, MAOB, TFRC, MGST1, CPOX, CISD2, HMGCR, PARK7, GYS2, RIDA, SRR, HNF4A, KYNU, DROSHA, KCNN2, IKBKG, ABCD1, IL6R, ACVR1, AOC3, XBP1, PCYT1A, HMGCS1, ZBTB38, EIF2AK1, DARS2, SLC8B1, RNF40, QDPR, PEX7, GJB1, ALDH5A1, VAPB, BHLHE40, KYAT3, THRSP, MASP1, SNRPC, ABCG2, ENG, NECTIN1	1.76035	0.21326	Cold_low
GOTERM_CC_DIRECT	GO:0005739~mitochondrion	66	0.000493196	CLIC4, GLDC, FASTKD2, GFM2, TAT, PARS2, ECI2, CPOX, PARK7, ELK3, AKR7A2, CASP8, SCP2, GM2A, FAM162A, CA5A, ZMIZ2, KYNU, MACROD1, GLUL, ABCD1, FADS1, RARS2, ACOT8, USP48, MAP2K2, MTUS1, DARS2, LIG3, THNSL1, TNFRSF1A, DUS2, ALDH5A1, BDH1, PEX5, GUF1, CCDC90B, NDUFB9, MAOB, GLS2, MGST1, MRPL14, MTIF3, HACD3, PLA2G6, TRAK2, SLC25A27, DGUOK, RIDA, TNRC18, TRMT1L, TEFM, KCNJ8, GOT1, BAD, TCAIM, G0S2, R…	1.53685	0.0409353	Cold_low
GOTERM_MF_DIRECT	GO:0016491~oxidoreductase activity	18	0.000525629	DMGDH, MTRR, MAOB, ADH1B, AKR1C1, AKR1A1, PIPOX, MSMO1, PTGR1, PDIA5, CRYZ, CYP2C9, SCCPDH, BDH1, HSD17B2, SC5D, CBR4, FADS1	2.62853	0.21326	Cold_low
GOTERM_BP_DIRECT	GO:0006699~bile acid biosynthetic process	6	0.00055988	CYP39A1, ACOT8, SCP2, CYP7B1, CYP7A1, CYP8B1	8.44668	0.246441	Cold_low
GOTERM_MF_DIRECT	GO:0030170~pyridoxal phosphate binding	9	0.000669928	SRR, GOT1, GLDC, TAT, CTH, HDC, KYNU, KYAT3, THNSL1	4.61146	0.21326	Cold_low
GOTERM_BP_DIRECT	GO:0036109~alpha-linolenic acid metabolic process	5	0.000721046	FADS2, ACOT8, SCP2, ABCD1, FADS1	11.3705	0.261191	Cold_low
GOTERM_BP_DIRECT	GO:0046835~carbohydrate phosphorylation	6	0.000875548	TKFC, NAGK, HKDC1, RBKS, GALK2, KHK	7.71219	0.261191	Cold_low
GOTERM_BP_DIRECT	GO:0006629~lipid metabolic process	15	0.000890086	HMGCS1, MID1IP1, OMA1, PLA2G6, LIPA, FADS2, HNF4A, SC5D, THRSP, CD36, CEPT1, LRP10, PLPP3, FADS1, SLC27A4	2.82453	0.261191	Cold_low
GOTERM_CC_DIRECT	GO:0032587~ruffle membrane	10	0.00127021	MACF1, PLEKHA1, DLC1, TPM1, SPATA13, LCP1, ITGA5, PDE9A, PPP1R9B, NME1	3.77966	0.0819811	Cold_low
GOTERM_MF_DIRECT	GO:0070402~NADPH binding	5	0.00136483	QDPR, MTRR, HMGCR, CBR4, CRYZ	9.73529	0.325854	Cold_low
GOTERM_CC_DIRECT	GO:0005783~endoplasmic reticulum	44	0.00142911	RTN3, UBXN2B, SGMS1, STAU1, ANP32A, KDELR1, UNC93B1, SAR1B, CCDC47, ATP10D, MGST1, TMTC2, CISD2, ATP2A2, MSMO1, HMGCR, PARK7, HACD3, AGPAT1, SERP1, APMAP, CREB3L2, KDR, SMIM14, AOC3, XBP1, TOR1A, MAP2K2, VCAM1, ENTPD5, TMC6, SLC39A14, DUS2, CPED1, MINPP1, PROC, P4HA1, VAPB, ABI1, ITGA5, MPPE1, PDE9A, CES2, SLC27A4	1.64698	0.0819811	Cold_low
GOTERM_CC_DIRECT	GO:0005737~cytoplasm	202	0.00158036	SLC23A2, SLC46A1, SLC4A1AP, MTRR, HHIP, BAIAP2L1, SCP2, RASSF5, CSPP1, TRIM25, ANKS1A, GLUL, CDK5RAP3, GAMT, MBNL2, ALG2, RBP5, SPATA13, TXNIP, ATF7, MPPE1, IDO2, TRIB1, SKAP2, ZNF397, MACF1, ANP32A, NEDD4L, MTMR9, COPS7A, PLA2G6, HACD3, LARS, PNPO, TNRC18, LTA4H, PCK1, ZBED5, SPTBN1, STAT5B, EGR1, XBP1, XRCC6, SETDB1, EIF2AK1, PTK2, PPP5C, RPS24, DZIP3, MOCS2, CLIC4, ARHGAP1, SMG7, AATF, KHK, GY…	1.19889	0.0819811	Cold_low
GOTERM_MF_DIRECT	GO:0005515~protein binding	336	0.0018132	CDA, SLC4A1AP, MTRR, TFRC, POP1, HHIP, CISD2, NUDT2, GPATCH4, TMEM97, SLC4A4, RCBTB2, ELK3, BAIAP2L1, SCP2, RASSF5, ZMIZ2, KDR, TRIM25, ANKFY1, ANKS1A, GLUL, CDK5RAP3, ACVR1, ARRDC4, ATG3, ACOT8, ST6GAL1, WSB1, TSTD2, COG4, ENTPD5, ARRDC3, SOX13, ALG2, SLC6A12, RFX1, TM4SF4, RBP4, GAREM1, RBP5, PPP1R3C, SPATA13, TXNIP, ATF7, PREB, MPPE1, LETMD1, PLPP3, TRIB1, SKAP2, ZNF397, MACF1, ANP32A, CFI, GA…	1.11704	0.346321	Cold_low
GOTERM_BP_DIRECT	GO:0006520~cellular amino acid metabolic process	7	0.00208471	QDPR, SRR, SLC7A7, GLS2, TAT, HDC, KYAT3	5.17359	0.550571	Cold_low
GOTERM_CC_DIRECT	GO:0005759~mitochondrial matrix	22	0.00221679	DMGDH, RARS2, PARG, GLDC, GFM2, GLS2, PARS2, DARS2, NUDT2, TDRD7, PARK7, NUDT9, DGUOK, ALDH5A1, BDH1, CPS1, CA5A, DNAJA3, OGDH, GUF1, CBR4, TEFM	2.08517	0.102219	Cold_low
GOTERM_BP_DIRECT	GO:0006103~2-oxoglutarate metabolic process	5	0.00269819	STAT5B, GOT1, TAT, OGDH, KYAT3	8.21205	0.607961	Cold_low
GOTERM_BP_DIRECT	GO:0006569~tryptophan catabolic process	4	0.00276241	KYNU, KMO, IDO2, ACMSD	13.1393	0.607961	Cold_low
GOTERM_CC_DIRECT	GO:0005782~peroxisomal matrix	7	0.00341054	FABP1, PEX7, ACOT8, SCP2, PEX5, ECI2, PIPOX	4.71636	0.141538	Cold_low
GOTERM_BP_DIRECT	GO:0051289~protein homotetramerization	8	0.00395472	CDA, SRR, ALDH5A1, CTH, DPYS, MAT1A, CBR4, CRYZ	3.94178	0.803417	Cold_low
GOTERM_BP_DIRECT	GO:0005975~carbohydrate metabolic process	14	0.00622776	KLB, PARG, B4GALT1, IDUA, HHIP, GFPT1, SLC2A2, SLC3A2, GANC, MGAM2, AKR7A2, HHIPL1, GALM, GALK2	2.37866	1	Cold_low
GOTERM_BP_DIRECT	GO:0006006~glucose metabolic process	8	0.00728023	ALDH5A1, SERP1, ONECUT1, INPPL1, AKR1A1, GALM, OMA1, PCK1	3.52996	1	Cold_low
GOTERM_CC_DIRECT	GO:0005778~peroxisomal membrane	7	0.00757885	ACBD5, MAP2K2, PEX6, PEX5, MGST1, HMGCR, ABCD1	4.01764	0.266019	Cold_low
GOTERM_CC_DIRECT	GO:0030175~filopodium	8	0.00777809	FGD4, VCAM1, B4GALT1, ABI1, SPATA13, INPPL1, LCP1, PPP1R9B	3.49219	0.266019	Cold_low
GOTERM_BP_DIRECT	GO:0009749~response to glucose	8	0.00788599	GYS2, EGR1, APOM, BAD, HNF4A, TXNIP, GLUL, KHK	3.47804	1	Cold_low
GOTERM_CC_DIRECT	GO:0005794~Golgi apparatus	42	0.00833313	MACF1, B4GALT1, UBXN2B, SAR1B, INPPL1, AATF, ATP2C1, TM9SF4, GGA2, FGD4, AKR7A2, DUSP10, VPS52, KDR, VTI1A, TRAPPC11, CD36, AOC3, USP8, RUBCN, ST6GAL1, MAP2K2, VCAM1, MINK1, MTUS1, AP1AR, FNDC3A, TMC6, SLC39A14, RNF144A, PROC, VAPB, SNX17, GORASP1, KAT6A, BHLHE40, ANGPTL3, ITGA5, MPPE1, LZTR1, PLPP3, PDE9A	1.50836	0.266019	Cold_low
GOTERM_BP_DIRECT	GO:0006957~complement activation, alternative pathway	4	0.00850397	CFD, C3, C5, C8A	9.09642	1	Cold_low
GOTERM_MF_DIRECT	GO:0017017~MAP kinase tyrosine/serine/threonine phosphatase activity	4	0.008794	DUSP10, DUSP1, DUSP16, DUSP6	8.98643	1	Cold_low
GOTERM_MF_DIRECT	GO:0005524~ATP binding	69	0.00908184	BMPR2, MAST2, PARS2, ILK, PEBP1, ATP2A2, KHK, NMRK1, STK16, KDR, DHX16, SMARCAD1, GLUL, ABCD1, RARS2, ACVR1, MKKS, ABCG5, MAP2K2, FBXO18, SPHK2, MINK1, DYRK1A, DARS2, LIG3, ABCC9, MAT1A, DDX50, NME1, ITPKB, LATS2, PEX6, HKDC1, TRIB1, RBKS, CSNK1G1, ABCG2, CUL9, ATP10D, ATP2C1, ACVR1B, DGUOK, GRK3, SRR, TKFC, LARS, BMS1, CNNM2, PMS1, CDK19, XRCC6, TOR1A, NEK4, KCNJ8, CDC42BPG, EIF2AK1, PTK2, HIPK2…	1.34796	1	Cold_low
GOTERM_MF_DIRECT	GO:0005543~phospholipid binding	9	0.00910512	FABP1, APOM, NR5A2, CPS1, BAD, APOH, APOC3, SPTBN1, ARHGAP35	3.05643	1	Cold_low
GOTERM_BP_DIRECT	GO:0000188~inactivation of MAPK activity	5	0.00925583	DUSP22, DUSP10, DUSP1, DUSP16, DUSP6	5.91268	1	Cold_low
GOTERM_CC_DIRECT	GO:0005902~microvillus	7	0.00982413	FOXA1, IFT20, AOC3, CLIC4, VCAM1, ESPN, SLC27A4	3.80618	0.287908	Cold_low
GOTERM_BP_DIRECT	GO:0032496~response to lipopolysaccharide	13	0.00983252	VCAM1, MAOB, KCNJ8, MGST1, GNG12, TNFRSF1A, SRR, CASP8, DUSP10, CPS1, TRIB1, PCK1, TNFRSF21	2.34344	1	Cold_low
Category	Term	Count	PValue	Genes	Fold Enrichment	Benjamini	Cluster
GOTERM_MF_DIRECT	GO:0008392~arachidonic acid epoxygenase activity	3	0.00288316	CYP2C9, CYP2C8, CYP2C18	36.6978	0.591048	IBA_high
GOTERM_BP_DIRECT	GO:0019373~epoxygenase P450 pathway	3	0.00367567	CYP2C9, CYP2C8, CYP2C18	32.5426	1	IBA_high
GOTERM_BP_DIRECT	GO:0006805~xenobiotic metabolic process	4	0.00724707	CYP2C9, CYP2C8, UGT2B15, CYP2C18	10.0131	1	IBA_high
GOTERM_MF_DIRECT	GO:0008395~steroid hydroxylase activity	3	0.0085874	CYP2C9, CYP2C8, CYP2C18	21.1718	0.880209	IBA_high
Category	Term	Count	PValue	Genes	Fold Enrichment	Benjamini	Cluster
GOTERM_BP_DIRECT	GO:0006084~acetyl-CoA metabolic process	3	4.01277e-05	FASN, ACACB, ACACA	279.867	0.0127527	IBA_low
GOTERM_BP_DIRECT	GO:0031325~positive regulation of cellular metabolic process	3	6.67679e-05	FASN, ACACB, ACACA	223.893	0.0127527	IBA_low
GOTERM_CC_DIRECT	GO:0005739~mitochondrion	10	0.00336752	HSP90AB1, MDH1, IVD, FASN, MFN1, TP53BP2, ACO1, ACACB, COQ10B, ACACA	3.11181	0.326649	IBA_low
GOTERM_BP_DIRECT	GO:2001295~malonyl-CoA biosynthetic process	2	0.00523388	ACACB, ACACA	373.156	0.666447	IBA_low
GOTERM_MF_DIRECT	GO:0003989~acetyl-CoA carboxylase activity	2	0.00726905	ACACB, ACACA	267.952	0.600388	IBA_low
GOTERM_BP_DIRECT	GO:0006633~fatty acid biosynthetic process	3	0.00818823	FASN, ACACB, ACACA	21.5282	0.746758	IBA_low
GOTERM_BP_DIRECT	GO:0032922~circadian regulation of gene expression	3	0.00977432	PER2, NAMPT, NR1D1	19.6398	0.746758	IBA_low
Category	Term	Count	PValue	Genes	Fold Enrichment	Benjamini	Cluster
GOTERM_MF_DIRECT	GO:0003824~catalytic activity	8	0.000119301	FH, ALAS1, PNP, ACSS2, GPT2, ISOC1, ACSM2B, ACSF2	7.1834	0.0324498	SA_high
GOTERM_CC_DIRECT	GO:0005829~cytosol	32	0.00156516	FH, ACSS2, PARN, RNF19B, ARHGAP17, FOXO3, CLU, AACS, HERC4, AKR7A3, PNP, CA2, PDE6D, FLNA, ASL, SRGAP2, IP6K3, LHPP, EGLN3, MAPK14, ASRGL1, JMJD6, SULT2B1, ACLY, PUDP, PAH, BCL2, FGFR1OP, AMOTL2, CORO7, HPD, NUCB2	1.72469	0.110606	SA_high
GOTERM_BP_DIRECT	GO:0006559~L-phenylalanine catabolic process	3	0.00175582	PAH, HPD, ASRGL1	46.731	1	SA_high
GOTERM_MF_DIRECT	GO:0005506~iron ion binding	6	0.00206752	EGLN3, P4HA2, SCD, PAH, CYP1A1, JMJD6	6.62	0.281182	SA_high
GOTERM_CC_DIRECT	GO:0005783~endoplasmic reticulum	13	0.00207842	INSIG1, EDEM2, ATP1A1, ZFYVE1, CLU, SULT2B1, STS, NPC1, P4HA2, SCD, BCL2, SLC38A9, NUCB2	2.80515	0.110606	SA_high
GOTERM_CC_DIRECT	GO:0005759~mitochondrial matrix	8	0.00228839	FH, ALAS1, OAT, GPT2, NAGS, ACADSB, ACSM2B, ACSF2	4.37105	0.110606	SA_high
GOTERM_BP_DIRECT	GO:0006631~fatty acid metabolic process	4	0.0033643	ACADSB, AACS, ACSM2B, ACSF2	13.1805	1	SA_high
GOTERM_CC_DIRECT	GO:0043231~intracellular membrane-bounded organelle	10	0.00381473	SULT2B1, TRAF7, STS, ACSS2, PPP1R3B, P4HA2, INSR, CYP1A1, ATP1A1, SMARCA2	3.20191	0.138284	SA_high
GOTERM_MF_DIRECT	GO:0016874~ligase activity	7	0.00513481	TRAF7, HERC4, TRIM2, RNF19B, DTX2, PDZRN3, ACSF2	4.37656	0.465556	SA_high
GOTERM_BP_DIRECT	GO:0042493~response to drug	7	0.00836712	PNP, NPC1, SRD5A1, BCL2, CYP1A1, ATP1A1, AACS	3.94549	1	SA_high
GOTERM_BP_DIRECT	GO:0008652~cellular amino acid biosynthetic process	3	0.00980737	OAT, GPT2, PAH	19.7708	1	SA_high
GOTERM_CC_DIRECT	GO:0031410~cytoplasmic vesicle	6	0.00994262	TRAF7, MARVELD3, PDE6D, AMOTL2, CORO7, AVPR1A	4.5617	0.288336	SA_high
Category	Term	Count	PValue	Genes	Fold Enrichment	Benjamini	Cluster
GOTERM_CC_DIRECT	GO:0005654~nucleoplasm	65	2.58378e-09	FCF1, CTDSPL2, ZNF45, IDE, LMNB1, RPS17, NOB1, RIOK2, BANF1, SOX9, JAK2, RPS10, TGIF1, CADPS2, MORC3, RPS7, HSBP1, ZNF281, VRK1, SCRIB, WBP11, YWHAZ, SENP1, MED7, UGDH, DNAJC2, PAPD7, RRM2B, HNRNPH1, POLR1D, TOP1, CGGBP1, DAP3, KDM3A, SF3B3, RNF34, PXN, RPL11, RPS27L, TXN, POLD4, PSMB4, POLR2A, DNAJB6, PCBP1, RPS27A, SPEN, TCF7L2, GCH1, EYA1, MGMT, NFYC, MPP5, HIPK1, PML, FANCF, SOD1, RPS26, RPS2…	2.10638	6.2269e-07	unassigned
GOTERM_BP_DIRECT	GO:0006364~rRNA processing	15	1.73001e-07	RPS7, RPL31, RPL11, FCF1, RPS27L, WBP11, RPL7, RPS26, RPS17, RPS27, NOB1, RIOK2, RPS27A, RPS10, RPS23	6.09849	0.00021504	unassigned
GOTERM_MF_DIRECT	GO:0044822~poly(A) RNA binding	35	2.31006e-07	RPL31, RPL11, FCF1, RPS27L, TXN, TFB1M, RPL7, DUSP11, RPS17, POLR2A, PCBP1, G3BP2, RPS27A, RPS10, ABT1, SPEN, BTF3, RPS7, DDX31, LARP4B, WBP11, YWHAZ, PDIA4, EIF1, RPS26, DNAJC2, RPS27, PHF5A, HNRNPH1, MKRN2, TOP1, SLC25A5, DAP3, RPS23, TRIM56	2.67003	8.20072e-05	unassigned
GOTERM_CC_DIRECT	GO:0022627~cytosolic small ribosomal subunit	8	8.97833e-07	RPS26, RPS17, RPS27, RPS7, RPS27L, RPS27A, RPS10, RPS23	15.0363	0.000108189	unassigned
GOTERM_BP_DIRECT	GO:0000184~nuclear-transcribed mRNA catabolic process, nonsense-mediated decay	11	1.09243e-06	RPS26, RPS17, RPS27, RPS7, RPL31, RPL11, RPS27A, RPS10, RPL7, RPS23, PNRC2	8.0425	0.000528383	unassigned
GOTERM_BP_DIRECT	GO:0006614~SRP-dependent cotranslational protein targeting to membrane	10	1.27526e-06	RPS26, RPS17, RPS27, RPS7, RPL31, RPL11, RPS27A, RPS10, RPL7, RPS23	9.25587	0.000528383	unassigned
GOTERM_BP_DIRECT	GO:0006413~translational initiation	11	3.9421e-06	RPS26, RPS17, RPS27, RPS7, RPL31, RPL11, RPS27A, RPS10, EIF1, RPL7, RPS23	6.98582	0.00122501	unassigned
GOTERM_BP_DIRECT	GO:0019083~viral transcription	10	5.52106e-06	RPS26, RPS17, RPS27, RPS7, RPL31, RPL11, RPS27A, RPS10, RPL7, RPS23	7.76832	0.00137254	unassigned
GOTERM_MF_DIRECT	GO:0003735~structural constituent of ribosome	13	1.0706e-05	RPS7, RPL31, RPL11, RPS27L, RPL7, RPS26, RPS17, RPS27, SLC25A5, RPS27A, RPS10, DAP3, RPS23	5.04351	0.00190032	unassigned
GOTERM_CC_DIRECT	GO:0005840~ribosome	11	1.59222e-05	RPS26, RPS17, RPS27, RPS7, RPL31, RPL11, RPS27L, RPS27A, RPS10, RPL7, RPS23	5.97829	0.00127909	unassigned
GOTERM_BP_DIRECT	GO:0006412~translation	13	3.51765e-05	RPS7, RPL31, RPL11, RPS27L, RPL7, RPS26, RPS17, RPS27, NACA, SLC25A5, RPS27A, RPS10, RPS23	4.47062	0.0072874	unassigned
GOTERM_CC_DIRECT	GO:0005829~cytosol	61	3.59831e-05	VPS29, RPL31, AMD1, IDE, SAT1, RPL7, RPS17, NOB1, FGFR1OP2, RIOK2, BANF1, LRRFIP1, JAK2, RPS10, RPS7, STARD8, NME2, AXIN1, VRK1, LARP4B, YWHAZ, UGDH, CNBD2, DNAJC2, DDIT4, POLR1D, TRIM56, SEC23A, RNF34, UBA5, PXN, RPL11, TXN, RHOBTB1, PSMB4, SNX1, DNAJB6, G3BP2, RPS27A, SNX8, GCH1, UROS, GSS, GSR, DHCR24, MTHFS, UBE2A, PML, SOD1, NFKBIA, RPS26, DNAJA1, HAL, BHMT, RPS27, ID2, GNB2, PDE7B, LPIN1, N…	1.66012	0.00216798	unassigned
GOTERM_CC_DIRECT	GO:0070062~extracellular exosome	53	8.31657e-05	VPS29, STEAP4, RPL31, PLOD2, RPL7, RPS17, HINT3, ACP2, BANF1, RPS10, ARSA, RPS7, SERPINF1, NME2, SCRIB, YWHAZ, UGDH, BTD, VAMP7, RRM2B, SLC25A5, PLPP1, PCYOX1, ABCB1, TEX264, RPL11, GLYAT, TXN, LIN7C, CPN2, PSMB4, GNG5, PCBP1, CD14, RPS27A, SPEN, HSPA5, NDUFA4, GSS, GSR, DSTN, MPP5, DHRS4, SOD1, RPS26, DNAJA1, BHMT, TCN2, NACA, XPNPEP3, GLOD4, GNB2, CYSTM1	1.70101	0.00400859	unassigned
GOTERM_BP_DIRECT	GO:0042771~intrinsic apoptotic signaling pathway in response to DNA damage by p53 class mediator	5	0.000409317	PGAP2, DDIT4, RPS27L, HIPK1, PML	14.0331	0.072683	unassigned
GOTERM_MF_DIRECT	GO:0031625~ubiquitin protein ligase binding	12	0.000520567	DNAJA1, NFKBIA, UBE2W, RNF34, TRAF4, POLR2A, HSPA5, AXIN1, UBE2A, SLC25A5, YWHAZ, PML	3.60115	0.0616005	unassigned
GOTERM_BP_DIRECT	GO:0000028~ribosomal small subunit assembly	4	0.00124594	RPS17, RPS27, RPS27L, RPS10	18.3169	0.178786	unassigned
GOTERM_BP_DIRECT	GO:0055114~oxidation-reduction process	17	0.00129451	ERO1A, SDR42E1, KDM3A, STEAP4, UQCRB, GSR, PLOD2, DHCR24, TXN, DHRS4, SOD1, HSD11B1, GLUD1, UGDH, RRM2B, PHYHD1, PCYOX1	2.49846	0.178786	unassigned
GOTERM_CC_DIRECT	GO:0005634~nucleus	81	0.00135763	GABPB2, ZNF251, PGAP2, ZFAND2A, IDE, RPL7, DUSP11, HINT3, ARIH2, BANF1, SOX9, LRRFIP1, JAK2, TGIF1, ABT1, RPS7, HSBP1, ZNF281, IFRD1, NCOA4, HUNK, NME2, AXIN1, UBE4A, VRK1, WBP11, YWHAZ, SENP1, UGDH, DNAJC2, TRAF4, PAPD7, HNRNPH1, TCEANC2, TOP1, SLC25A5, CGGBP1, RABL6, KDM3A, SF3B3, RNF34, UBA5, RPS27L, TXN, ZBTB4, POLD4, PSMB4, POLR2A, DNAJB6, ZKSCAN8, RPS27A, S100PBP, BTF3, SPEN, CASP8AP2, TCF7…	1.34952	0.0545315	unassigned
GOTERM_CC_DIRECT	GO:0032993~protein-DNA complex	4	0.00254203	TCF7L2, EYA1, NFYC, NFE2L2	14.4349	0.0652143	unassigned
GOTERM_BP_DIRECT	GO:0015949~nucleobase-containing small molecule interconversion	4	0.00281207	RRM2B, GSR, NME2, TXN	13.9208	0.317764	unassigned
GOTERM_BP_DIRECT	GO:0034612~response to tumor necrosis factor	4	0.00281207	GCH1, GSS, CD14, JAK2	13.9208	0.317764	unassigned
GOTERM_CC_DIRECT	GO:0005737~cytoplasm	77	0.00301872	VPS29, ZFAND2A, IDE, RPL7, HINT3, NARS2, ARIH2, BANF1, LRRFIP1, JAK2, MFSD2A, RPS7, IFT140, IFRD1, HUNK, NME2, AXIN1, UBE4A, VRK1, NSUN6, SCRIB, LARP4B, WBP11, YWHAZ, SENP1, DNAJC2, VAMP7, TRAF4, PAPD7, RRM2B, HNRNPH1, DDIT4, RCCD1, RABL6, TRIM56, KDM3A, RNF34, UBA5, RGS16, PXN, RPL11, TXN, LIN7C, PSMB4, SNX1, CLMN, PCBP1, G3BP2, CDC37L1, RPS27A, BTF3, CASP8AP2, TCF7L2, GCH1, EYA1, MTHFS, UBE2A, …	1.33029	0.0652143	unassigned
GOTERM_CC_DIRECT	GO:0015935~small ribosomal subunit	4	0.00318093	RPS26, RPS27A, RPS23, DAP3	13.3656	0.0652143	unassigned
GOTERM_CC_DIRECT	GO:0005739~mitochondrion	27	0.00318665	ATP5I, GLYAT, IDE, TXN, TFB1M, GCSH, GNG5, NARS2, CASP8AP2, HSPA5, NDUFA4, CCDC58, UROS, GSR, SDHD, YWHAZ, DHRS4, SOD1, DNAJA1, YRDC, GLUD1, RRM2B, GLOD4, XPNPEP3, DDIT4, SLC25A5, DAP3	1.83011	0.0652143	unassigned
GOTERM_CC_DIRECT	GO:0016020~membrane	39	0.00322819	ERO1A, KDM3A, ABCB1, RPL31, RPL11, LMNB1, HERPUD1, RPL7, HSD11B1, RPS17, SNX1, DNAJB6, GNG5, PCBP1, ACP2, MGAT2, JAK2, RPS27A, RPS10, JAG1, HSPA5, RPS7, MGMT, ALG5, SUCO, DHCR24, LARP4B, RPS26, DNAJA1, YRDC, VAMP7, ABHD17B, HNRNPH1, GNB2, CALU, SLC25A5, PLPP1, RPS23, CDS2	1.59932	0.0652143	unassigned
GOTERM_CC_DIRECT	GO:0005789~endoplasmic reticulum membrane	20	0.00324718	ERO1A, SEC23A, HSPA5, PGAP2, SIGMAR1, ALG5, PLOD2, DHCR24, SLC35G1, HERPUD1, DHRS4, HSD11B1, SGPL1, VAMP7, CALU, SCAP, LPIN1, CNIH3, MFSD2A, CDS2	2.09322	0.0652143	unassigned
GOTERM_BP_DIRECT	GO:0002011~morphogenesis of an epithelial sheet	3	0.00348037	JAG1, MPP5, LIN7C	32.6269	0.360509	unassigned
GOTERM_CC_DIRECT	GO:0005925~focal adhesion	12	0.00419288	RPS17, RPS7, HSPA5, RPL31, STARD8, GNB2, PXN, NME2, RPS10, YWHAZ, RPL7, SENP1	2.76883	0.0777296	unassigned
GOTERM_MF_DIRECT	GO:0005515~protein binding	121	0.00452548	ERO1A, VPS29, GABPB2, PGAP2, RPL31, SAT1, RPL7, GCSH, FGFR1OP2, PHYHD1, BANF1, SOX9, RPS10, ABT1, ARSA, RPS7, SERPINF1, ZNF281, UBE4A, VRK1, CDPF1, SCRIB, LARP4B, WBP11, PDIA4, MED7, TCEANC2, CGGBP1, RABL6, DAP3, ABCB1, UQCRB, TEX264, UBA5, PEX11A, PXN, GLYAT, TXN, ZBTB4, SGPL1, SNX1, PCBP1, G3BP2, SCAP, CD14, SNX8, BTF3, JAG1, HSPA5, DSTN, UBE2A, FANCF, GADD45G, ZBTB9, RPS26, NFKBIA, GLUD1, UBE2…	1.18628	0.401636	unassigned
GOTERM_BP_DIRECT	GO:0006457~protein folding	8	0.0047063	ERO1A, DNAJA1, DNAJB6, NFYC, GNB2, CDC37L1, TXN, PDIA4	3.8669	0.449995	unassigned
GOTERM_BP_DIRECT	GO:0036499~PERK-mediated unfolded protein response	3	0.00796061	HSPA5, NFE2L2, HERPUD1	21.7513	0.691643	unassigned
GOTERM_BP_DIRECT	GO:0097190~apoptotic signaling pathway	5	0.00887035	CASP8AP2, SGPL1, CD14, SENP1, DAP3	6.12713	0.691643	unassigned
GOTERM_BP_DIRECT	GO:0043161~proteasome-mediated ubiquitin-dependent protein catabolic process	8	0.00890288	UBE2W, PSMB4, RNF34, AXIN1, UBE2A, RPS27A, PML, NFE2L2	3.42878	0.691643	unassigned
GOTERM_BP_DIRECT	GO:0000302~response to reactive oxygen species	4	0.00994116	ERO1A, GSR, TXN, SOD1	8.92361	0.726874	unassigned
